# Supplementary material for: Functional diversification of centrins and cell morphological complexity
Source: Oxford University Press journal article supplement (doi:10.1242/jcs.019414), 2007-12-06

### Supplemental Figure S1. Distribution of ICL peptides obtained by mass spectroscopy

Distribution of the identified peptides into the different protein sub-families. The number of peptides specific of a sub-family is given in parenthesis. The large majority of the peptides identified correspond to the Sfi1p-like proteins, PtCenBP1p and PtCenBP3p sub-families (in green) and the centrin sub-families (in blue).

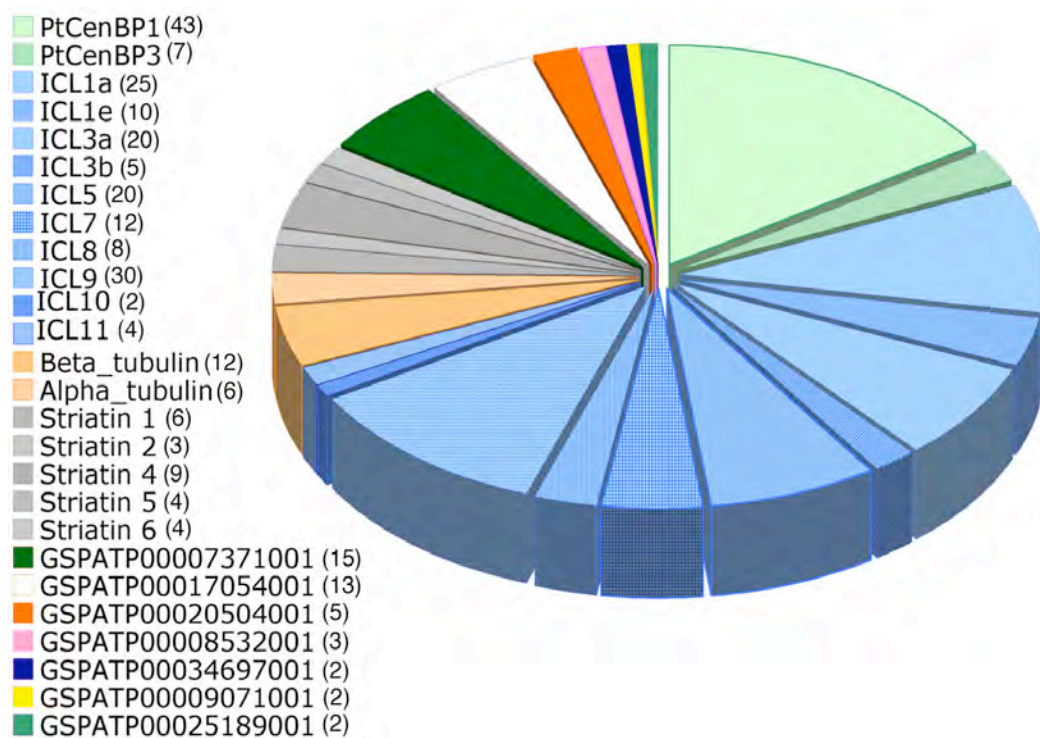

Supplement: jcs019414-sup-019414-figs1.pdf [file jcs019414-sup-019414-figs1.pdf]
