# Supplementary material for: Functional diversification of centrins and cell morphological complexity
Source: Oxford University Press journal article supplement (doi:10.1242/jcs.019414), 2007-12-06
Supplement: jcs019414-sup-019414-figs2.pdf [file jcs019414-sup-019414-figs2.pdf]

## Supplemental Figure S2. Sequence alignment of PtCenBP1p, PtCenBP2p and PtCenBP3p.

Sequence alignments were realized using the ClustalW program. For convenience, each PtCenBP1p repeat (r1 to r6) is aligned separately. Conserved residues are underlined in black and similar residues in grey.

```

CenBP1_Start 1 MPPGQLQKNKQQQKNVLTPOKLELLQENRKLLSHIFNMGNLNGQHNLHRAMLRMRAMIE
CenBP3 1 -----MLSDS
CenBP2 1 -----MLSDT
CenBP1_end 1 -----
CenBP1_rP1 1 -----
CenBP1_rP2 1 -----
CenBP1_rp3 1 -----
CenBP1_rP4 1 -----
CenBP1_rP5 1 -----
CenBP1_rP6a 1 -----

```

```

CenBP1_Start 61 KKIDVSKISKKIKGKIVSQLLRYESHSTLHEAFIRWKVRADPEIVKKAVDQILLNSRLNE
CenBP3 6  NNRLSTQLSPKLGIIIVSQLIKQSSLSIQDAFIRWQVRTNPEIVKKAVDKILLNSKLNQ
CenBP2 6  NNQLSTKLSPKLKGIIIVSQLIKQONLTLQDAFIRWQVRTNPEIVKQAVDKILLNSKLNQ
CenBP1_end 1 -----
CenBP1_rP1 1 -----
CenBP1_rP2 1 -----
CenBP1_rp3 1 -----
CenBP1_rP4 1 -----
CenBP1_rP5 1 -----
CenBP1_rP6a 1 -----

```

```

CenBP1_Start 121 FNAFHKLKNLLGQKDLQK-KMNAKKRKNMCLMNLALFLQKKEFQLKTAAVAAALKPKNQDS
CenBP3 66  FNAFHKLKFLLGTQPPKEVRMNAKKKKNLSIINLALFVQKKEQQLKRAIESIKPTSQDT
CenBP2 66  FNAFHKLKFLLGTQPPKEARMNARKKKNLSLINLALFIQKKEQQLKRAIESIKPTSQDS
CenBP1_end 1 -----
CenBP1_rP1 1 -----
CenBP1_rP2 1 -----
CenBP1_rp3 1 -----
CenBP1_rP4 1 -----
CenBP1_rP5 1 -----
CenBP1_rP6a 1 -----

```

```

CenBP1_Start 180 DKMLGLLIWSISSKHRERYLREKFNWWRLYSKVKSDKLQQLKALERLGDEYNMRNDRLD
CenBP3 126 NKMLGLLIWSISSKYRERYLREKFNWWKLIAKIKSNKLEKQLKALERLGDEYNMRNDRLD
CenBP2 126 NKMLGLLIWSISSKYRERYLREKFNWWKLIAKMKSNKLEKQLKALEILGDEYNMRNDRLD
CenBP1_end 1 -----
CenBP1_rP1 1 -----
CenBP1_rP2 1 -----
CenBP1_rp3 1 -----
CenBP1_rP4 1 -----
CenBP1_rP5 1 -----
CenBP1_rP6a 1 -----

```

CenBP1\_Start 240 RQRLKEVQNISNYQAFEKWRGDLNFRLLKKKFFSVLLKTTFGRLQRCYTRWVDLPDKRE  
CenBP3 186 RQRLKE-----AFEIWRGDLNFRLLKKKFFAVLLKTTFGRLQRCYTRWVDLPDKRE  
CenBP2 186 RSRLKE-----AFEIWRGDLNFRLLKKKFFAVLLKTTFGRLQRCYTRWVDLPDKRE  
CenBP1\_end 1 -----  
CenBP1\_rP1 1 -----  
CenBP1\_rP2 1 -----  
CenBP1\_rp3 1 -----  
CenBP1\_rP4 1 -----  
CenBP1\_rP5 1 -----  
CenBP1\_rP6a 1 -----

CenBP1\_Start 300 NDMKKQGMLLITKLTNKAQONKRLVWNSFKAITDDAKNKKTKVIRELIEVTFNQSYTAFY  
CenBP3 237 NDIKKQGLLLINKLGNKVDQONKRLVWNAFKDIHDEAKNKKTKVIRELIEVTFNQSYTAFY  
CenBP2 237 NDIKKQGLLLINKLGNKVDQONKRLVWNAFKDIHDEAKNKKTKVIRELIEVTFNQSYTAFY  
CenBP1\_end 1 -----  
CenBP1\_rP1 1 -----  
CenBP1\_rP2 1 -----  
CenBP1\_rp3 1 -----  
CenBP1\_rP4 1 -----  
CenBP1\_rP5 1 -----  
CenBP1\_rP6a 1 -----

CenBP1\_Start 360 KWANYNTYAKLTETNLRKIKALQASANVTQQLVKFETFKLFGLSKKAEICSFNLKILKI  
CenBP3 297 KWANYNTYAKLTETNLRKIKSFOQSANVTHQLVKQETFKLFNLSKKMQICSFLDKIILKL  
CenBP2 297 KWANYNTYAKLTETNLRKIKSLQQSANVTHQLVKQETFKLFNLSKKMQICSFLDKIILKL  
CenBP1\_end 1 -----  
CenBP1\_rP1 1 -----  
CenBP1\_rP2 1 -----  
CenBP1\_rp3 1 -----  
CenBP1\_rP4 1 -----  
CenBP1\_rP5 1 -----  
CenBP1\_rP6a 1 -----

CenBP1\_Start 420 QQRQKLDALRQIENVSQKMKQEKLDNINVKQEIISRLGDTANKTEKGLLRQVLRKFALLR  
CenBP3 357 QQRQKLDALRQIENYCVQKMKMEKLNINVKQDLISRLKDTANKTEKGLLRQVLRKFALLR  
CenBP2 357 QQRQKLDALRQIENYCVQKMKMEKLNINVKQDLISRLKDTANKTEKGLLRQVLRKFALLR  
CenBP1\_end 1 -----  
CenBP1\_rP1 1 -----  
CenBP1\_rP2 1 -----  
CenBP1\_rp3 1 -----  
CenBP1\_rP4 1 -----  
CenBP1\_rP5 1 -----  
CenBP1\_rP6a 1 -----

CenBP1\_Start 480 EQQEIKNKYFVRIISITSGMAMDAFRRWKQLPDPAEQOMIQNVSKFQLRLOFLFKQRVKQ  
CenBP3 417 TTQEIKNKYFGRILLSVNGQLIDAFRWKTLPNPNDINNIQKASKFQIKLQMFITNKRKQ  
CenBP2 417 EQQEIKNKYFGKILLSVNGQLIDAFRWKTLPNPNDINNIQKASKFQIKLQMFITNKRKQ  
CenBP1\_end 1 -----  
CenBP1\_rP1 1 -----  
CenBP1\_rP2 1 -----  
CenBP1\_rp3 1 -----  
CenBP1\_rP4 1 -----  
CenBP1\_rP5 1 -----  
CenBP1\_rP6a 1 -----

CenBP1\_Start 540 **SFDPLKEVYYQGIQSKRLCIKQMLVKQLSAPQRFRLQWQSMNKIYKSVIACQKTNNFFDS**  
CenBP3 477 **AYDPLKYLYYDALQKKRFCIRQLFSVTMSAPQRYLKQWQNVAKVYKSVVACQKTNNLFYS**  
CenBP2 477 **AYDPLKYLYYDALQKKRFCIRQLFSVTMSAPQRYLKQWQNVAKVYKSVVACQKTNNLFYS**  
CenBP1\_end 1 -----  
CenBP1\_rP1 1 -----  
CenBP1\_rP2 1 -----  
CenBP1\_rp3 1 -----  
CenBP1\_rP4 1 -----  
CenBP1\_rP5 1 -----  
CenBP1\_rP6a 1 -----

CenBP1\_Start 600 **LQDVLKNNLKAFLYTRKDAEVKEKCLVKLMSSTFNLMIAFLKWKNYNKQOKISENLGDE**  
CenBP3 537 **LALITQSNLLTFVQNKKDVDIKEKCIQKILASQHSNLAIAFFKWKSHNKQEQILERLGDE**  
CenBP2 537 **LAMILQSNLLAFTIQNKKDVDIKEKCIQKILASQHSNLAIAFFRWKSONKQQQILERLGDE**  
CenBP1\_end 1 -----  
CenBP1\_rP1 1 -----  
CenBP1\_rP2 1 -----  
CenBP1\_rp3 1 -----  
CenBP1\_rP4 1 -----  
CenBP1\_rP5 1 -----  
CenBP1\_rP6a 1 -----

CenBP1\_Start 660 **KKKMLLNLQRFIKNDNLNRLRRILRLFYNEQQVNQLIKKIHLRVL-----**  
CenBP3 597 **KMKFLILNLKKEFLENDKKQRLRRALNLF L V Q IKKINLRLMQTVVGQVSSSFQKW**  
CenBP2 597 **KMKFLILNLKKEFLENDKKQRLRRALNLFNSNLQIAQQIKKINLRLMQTVIGQVSTSFQKW**  
CenBP1\_end 1 -----  
CenBP1\_rP1 1 -----  
CenBP1\_rP2 1 -----  
CenBP1\_rp3 1 -----  
CenBP1\_rP4 1 -----  
CenBP1\_rP5 1 -----  
CenBP1\_rP6a 1 -----

CenBP1\_Start -----  
CenBP3 657 **KYLPEDKVNGSIAKVS KFMISLGRVAYRFVKVNSWNIMEDYLLDGGQAKKCYCINKIISVG**  
CenBP2 657 **KYLPEDRVNGKTVKVS KFMISLGRVAYRFVKVNSWNILEDLLEGGQAKKCYCINKIIFSVG**  
CenBP1\_end 1 -----  
CenBP1\_rP1 1 -----  
CenBP1\_rP2 1 -----  
CenBP1\_rp3 1 -----  
CenBP1\_rP4 1 -----  
CenBP1\_rP5 1 -----  
CenBP1\_rP6a 1 -----

CenBP1\_Start -----  
CenBP3 717 **QSDLKTAFLIWHRRSWEMKMFDFQFSQLNVTLNDEI IKQRLINWINSGNKVKHYALIEILK**  
CenBP2 717 **QSDLKTAFLSWHRRSWEMKMFDFQFSQLNVTLNDEI IKQRLVNWINSGYKVKHYALIEILK**  
CenBP1\_end 1 -----  
CenBP1\_rP1 1 -----  
CenBP1\_rP2 1 -----  
CenBP1\_rp3 1 -----  
CenBP1\_rP4 1 -----  
CenBP1\_rP5 1 -----  
CenBP1\_rP6a 1 -----

CenBP1\_Start -----

CenBP3 777 RFHQNAESHNLRRKALAIHRNTISQVWISFNKWKQIPEHDYSQL-TKVTKFEQSINRFL  
 CenBP2 777 RFHQNAOSYNLRRKALAIHRNTISQVWISFNKWKQIPELDYSQL-AKVTKFEQQFNHFL  
 CenBP1\_end 1 -----  
 CenBP1\_rP1 1 -----RNTISQVWLSFNRWKQLPEENNDLKVQATKFEKSLSKFV  
 CenBP1\_rP2 1 -----RTQIGAVWDTFNKWKNLPEANPDDL-IKASRFETQLNKFT  
 CenBP1\_rp3 1 -----RTQIGAVWDTFNKWKNLPEANADDL-IKASRFETQLNKFT  
 CenBP1\_rP4 1 -----RTQIGAVWDTFNKWKNLPEANPDDL-IKASKFETQLNKFT  
 CenBP1\_rP5 1 -----RTQIGAVWDTFNKWKNLPEANPDDL-IKASRFETQLNKFT  
 CenBP1\_rP6a 1 -----RTQIGAVWDTFNKWKNLPEANPDDL-IKASRFETQLNKFT

CenBP1\_Start -----  
 CenBP3 836 IRQAKKKTWNPLNEIYDDALAIKKRAVLLLVKTOESEQQALSCKWNKNVALIQEVERCKS  
 CenBP2 836 IRQTKKKTWNPLNEIYDDALAIKKRAVLLLVKTOESEQQALSCKWNKNVSLIQEVERCKS  
 CenBP1\_end 1 -----  
 CenBP1\_rP1 41 FHILKKHSWNPLQEVYDDGLAIKKRAVLLMIKTOESEQQRTLDQWNKNVSLIREVERCKV  
 CenBP1\_rP2 40 LHIWRKRTWNPLQEVYDDAALKKRAIILMIKTOESEQQRALDQWNKNVGLMKEVERCKC  
 CenBP1\_rp3 40 LHIWRKRTWNPLQEVYDDAALKKRAIILMIKTOESEQQRALDQWNKNVGLMKEVERCKC  
 CenBP1\_rP4 40 LHIWRKRTWNPLQEVYDDAALKKRAIILMIKTOESEQQRALDQWNKNVGLMKEVERCKC  
 CenBP1\_rP5 40 LHIWRKRTWNPLQEVYDDAALKKRAIILMIKTOESEQQRALDQWNKNVGLMKEVERCKC  
 CenBP1\_rP6a 40 LHIWRKRTWNPLQEVYDDAALKKRAIILMIKTOESEQQRALDQWNKNVGLMKEVERCKC

CenBP1\_Start -----  
 CenBP3 896 VILLFKFGVDQIQCNLQIMOPNOESRLKEKALLKIIGGNYDNIIRYFFMRWRNYLKFERLQ  
 CenBP2 896 VILLFKFGVDQIQFNLQIMOPNOESRLKEKALLKIIGGNYDNIIRYFFMRWTNYLKFERIQ  
 CenBP1\_end 1 -----  
 CenBP1\_rP1 101 VISLFLGLIGSHIKNNIAPLKPDEESQKKEKALLRLIGNFDSNLRYFFMKWYNDGKLEKLO  
 CenBP1\_rP2 100 VIGLFGFIGVHIKNNIAPLKPDEESQKKEKALLRLIGNFDSNLRYFFMKWYNDGKLEKLO  
 CenBP1\_rp3 100 VIGLFGFIGVHIKNNIAPLKPDEESQKKEKALLRLIGNFDSNLRYFFMKWYNDGKLEKLO  
 CenBP1\_rP4 100 VIGLFGFIGVHIKNNIAPLKPDEESQKKEKALLRLIGNFDSNLRYFFMKWYNDGKLEKLO  
 CenBP1\_rP5 100 VIGLFGFIGVHIKNNIAPLKPDEESQKKEKALLRLIGNFDSNLRYFFMKWYNDGKLEKLO  
 CenBP1\_rP6a 100 VIGLFGFIGVHIKNNIAPLKPDEESQKKEKALLRLIGNFDSNLRYFFMKWYNDGKLEKLO

CenBP1\_Start -----  
 CenBP3 956 -AIEGEKKEFLRQIGGFYRNNMKSRLRLALSFKFRNSVLSAVQQKFFSRLFSTKFGGAI  
 CenBP2 956 -AIEGEKKEFLRQIGGFYRNNMKSRLRLALSFKFRNSVLSAVQQKFFSRLFSTKFGGAI  
 CenBP1\_end 1 -----  
 CenBP1\_rP1 161 GAMTDEKKKLLLEAINNFSKNNDFARLRAILAKFRRNSSITAVQDRFFAKLFATQFGGAI  
 CenBP1\_rP2 160 GAMTDEKKKLLLEAINNFSKNNDFARLRAILAKFRRNSSITAVQDRFFAKLFATQFGGAI  
 CenBP1\_rp3 160 GAMTDEKKKLLLEAINNFSKNNDFARLRAILAKFRRNSSITAVQDRFFAKLFATQFGGAI  
 CenBP1\_rP4 160 GAMTDEKKKLLLEAINNFSKNNDFARLRAILAKFRRNSSITAVQDRFFAKLFATQFGGAI  
 CenBP1\_rP5 160 GAMTDEKKKLLLEAINNFSKNNDFARLRAILAKFRRNSSITAVQDRFFAKLFATQFGGAI  
 CenBP1\_rP6a 160 GAMTDEKKKLLLEAINNFSKNNDFARLRAILAKFRRNSSITAVQDRFFAKLFATQFGGAI

CenBP1\_Start -----  
 CenBP3 1015 VAFQKWKNLPEIQNYENVKKGRRLEKLEENLYRGRIKLSYDPLKDEYQEQAMNKKMHCIKQ  
 CenBP2 1015 VAFQKWKNLPEIQNFENLKKGRRLEKLEENLYRGRIKLSYDPLKDEYQEQAMNKKLHCIRK  
 CenBP1\_end 1 -----  
 CenBP1\_rP1 221 KAFQKWKNLPEPVNTEQLKNARKFERTLDILFRSHLKVSDPLKEDYMDALNIKRMCLRK  
 CenBP1\_rP2 220 KAFQKWKNLPEPVNTEQLKNARKFERTLDILFRSHLKVSDPLKEDYMDALNIKRMCLRK  
 CenBP1\_rp3 220 KAFQKWKNLPEPVNTEQLKNARKFERTLDILFRSHLKVSDPLKEDYMDALNIKRMCLRK  
 CenBP1\_rP4 220 KAFQKWKNLPEPVNTEQLKNARKFERTLDILFRSHLKVSDPLKEDYMDALNIKRMCLRK  
 CenBP1\_rP5 220 KAFQKWKNLPEPVNTEQLKNARKFERTLDILFRSHLKVSDPLKEDYMDALNIKRMCLRK  
 CenBP1\_rP6a 220 KAFQKWKNLPEPVNTEQMKNARKFERTLDILFRGRVKAQFEPLKDVYQEGNSKKLYCLRK

CenBP1\_Start -----  
 CenBP3 1075 LIILGMGSNKRLFLSWRNTNRLKSIETCKQTTFQTLALTLSGNVQVIFKTN---QLQ  
 CenBP2 1075 LIILGMGLNKRLFLWRNTNRLKSIETCKQTTFQTLALTLSGNVQVIFKTN---QLQ  
 CenBP1\_end 1 -----  
 CenBP1\_rP1 281 LFEKSMSAHKRLFLLWAQQNRQAKQIEVCRLTTALFVGLAQIVTANVQPIMQNPREAQAK  
 CenBP1\_rP2 280 LFEKSMSAHKRLFLLWAQQNRQAKQIEVCRLTTALFVGLAQIVTANVQPIMQNPREAQAK  
 CenBP1\_rp3 280 LFEKSMSAHKRLFLLWAQQNRQAKQIEVCRLTTALFVGLAQIVTANVQPIMQNPREAQAK  
 CenBP1\_rP4 280 LFEKSMSAHKRLFLLWAQQNRQAKQIEVCRLTTALFVGLAQIVTANVQPIMQNPREAQAK  
 CenBP1\_rP5 280 LFEKSMSAHKRLFLLWAQQNRQAKQIEVCRLTTALFVGLAQIVTANVQPIMQNPREAQAK  
 CenBP1\_rP6a 279 LMTLAMGQNKRLFLYWRDINRLHKSIECTKYTTNLFQTLAFTIAGHVQSIIFKPNKQ---Q

CenBP1\_Start -----  
 CenBP3 1132 EKVFEEKLSQYNNLLRWAFIKWNNQAKSDRIASLMDK---ETRKFFLLFALQRNLKHNKI  
 CenBP2 1132 EKVFEEKLSKYNNLLRWGFIKWNNQAKSAKTASLMDQ---EKRKFFLLFALQRNLKHNQN  
 CenBP1\_end 1 -----  
 CenBP1\_rP1 341 EKALHLIFQGOAENLSRAFFLWRNRAQQERMNQNFEDALTIIEKKKQLTEQLVQFENGKNF  
 CenBP1\_rP2 340 EKALHLIFQGTENLLRAFFKWRNWSQQDRMNDNLLNQLQSEQRKELVDRLQGFCHGNKL  
 CenBP1\_rp3 340 EKALHLIFQGTENLLRAFFKWRNWSQQDRMNDNLLNQLQSEQRKELVDRLQGFCHGNKL  
 CenBP1\_rP4 340 EKALHLIFQGOAENLSRAFFLWRNRAQQERMNQNFEDALTIIEKKKQLTEQLVQFENGKNF  
 CenBP1\_rP5 340 EKALHLIFQGOAENLSRAFFLWRNRAQQERMNQNFEDALTIIEKKKQLTEQLVQFENGKNF  
 CenBP1\_rP6a 336 ESVLNKMLLNYNNTLRWAFVHWNNQAKQAKIQSOLDD---EKKKLLLFALHRNLRNTDQ

CenBP1\_Start -----  
 CenBP3 1188 GQIRDILRNFNDRNRINLIKKIQLKFLHTFAGQVETSFLKWKQLPDSNLKQASRFEQK  
 CenBP2 1188 GQIRDILRKFNDGRSRQNLIKKIQLKILHTFAGQVETSFLKWKQLPDSNLKQASIFEQK  
 CenBP1\_end 1 -----  
 CenBP1\_rP1 401 ALYRQILAKFSLAHKKEKLVLQINARIL  
 CenBP1\_rP2 400 NLYRILAKFSLAHKKEKLVLQINARIL  
 CenBP1\_rp3 400 NLYRILAKFSLAHKKEKLVLQINARIL  
 CenBP1\_rP4 400 ALYRQILAKFSLAHKKEKLVLQINARIL  
 CenBP1\_rP5 400 ALYRQILAKFSLAHKKEKLVLQINARIL  
 CenBP1\_rP6a 392 CKLRDILRKFSEKROKQALIKKIQLQL

CenBP1\_Start -----  
 CenBP3 1248 LNSFKIQILRKSSFYQLQNIYQDGQAKQKFAINKLMFNCMSVEKKVFLQWNKVSELOKTE  
 CenBP2 1248 LNSFKIQILRKSSFYQLQNIYQDGQAKQKFAINKLIFNCMSAEKKAFLQWNKVSELOKTE  
 CenBP1\_end 1 -----  
 CenBP1\_rP1 -----  
 CenBP1\_rP2 -----  
 CenBP1\_rp3 -----  
 CenBP1\_rP4 -----  
 CenBP1\_rP5 -----  
 CenBP1\_rP6a -----

CenBP1\_Start -----  
 CenBP3 1308 RASKVMGFFGSINKIQQNHYFFFEDQIKELKKQEELVRLLEKWEEMFKDSYQKWKQTQ  
 CenBP2 1308 QRASKVFSFFGSINKIQQNHYFFFEDQIKELKKQEELVRLLEKWEEDMFKDSYQKWKQTQ  
 CenBP1\_end 1 -----  
 CenBP1\_rP1 -----  
 CenBP1\_rP2 -----  
 CenBP1\_rp3 -----  
 CenBP1\_rP4 -----  
 CenBP1\_rP5 -----  
 CenBP1\_rP6a -----

```

CenBP1_Start -----
CenBP3      1368 AKLDLLASQNRQKQKFSIIEILKDYIQNKKNYNLRLILRKFSNSNKSQKAVNKFLLGISH
CenBP2      1368 AKLDLLASQNRQKQKFSIIEILKDYIQNKKNYNLRLILRKFSNSNQRQKAVNKFLLGISH
CenBP1_end   1 -----
CenBP1_rP1  -----
CenBP1_rP2  -----
CenBP1_rp3  -----
CenBP1_rP4  -----
CenBP1_rP5  -----
CenBP1_rP6a -----

```

```

CenBP1_Start -----
CenBP3      1428 SSIGQLHNSFQMWRRRLPEPQKTKO--GYIFEKKIFSLFRKQLLOS--FDGLQDIYFQALNK
CenBP2      1428 SSIGQLHNSFQMWRRRLPEPQKTKO--GYIFEKKLFLFRROLLOS--FDGLQDIYFQALNK
CenBP1_end   1 --VGOIEVSFOKWKALPETKALDOMKASIFEKSLNRFKIHMRKSAYNQLYNIYLDGQAK
CenBP1_rP1  -----
CenBP1_rP2  -----
CenBP1_rp3  -----
CenBP1_rP4  -----
CenBP1_rP5  -----
CenBP1_rP6a -----

```

```

CenBP1_Start -----
CenBP3      1485 KRRVLLLVRTTKSQQQQAVQRWRDAINQMNQOELQNVQENRKLAIQLFYQHKNQNLNVA
CenBP2      1485 KRRVLLLVRTTKSQQQQSVQRWRDAINQMNQOELQNVQENRKLAIQLFYQHKNQNLNVA
CenBP1_end   59 QRYAANKM YNCMSAOKKAFKWKYKVEFSKAAEAFDTSKKKLAIQLFYQHKNQNLNVA
CenBP1_rP1  -----
CenBP1_rP2  -----
CenBP1_rp3  -----
CenBP1_rP4  -----
CenBP1_rP5  -----
CenBP1_rP6a -----

```

```

CenBP1_Start -----
CenBP3      1545 FIEWRDTIRLHTNKQENKTQDERLKKEAILLFQNYAYVRLRVYFTQWKIRAVKRNMIQI
CenBP2      1545 FIEWRDTIRLHTNKQENKTQKEERLKKEAILLFQNYAYVRLRVYFTQWKIRAVKRNMIQI
CenBP1_end   119 FVEWRLSSHTTNKQETAQEREVRLKREAILLFQNFQIRLRITYQRWNIIRAVKKNMISV
CenBP1_rP1  -----
CenBP1_rP2  -----
CenBP1_rp3  -----
CenBP1_rP4  -----
CenBP1_rP5  -----
CenBP1_rP6a -----

```

```

CenBP1_Start -----
CenBP3      1605 CQAIQRMQLNRFQAEKAMKKYVMDIWKGPSKNKWFKRVADIIAKNSKISKQIAYWRMRD
CenBP2      1605 CQAIQRMQLNRFQAEKAIKKYVMDVWKGPSKNKWFKRVADIIAKNSRISKQVAYWRMRD
CenBP1_end   179 FNAIQKLLFINMKQDRELIKALDIWRGPKLQNOWFORVAEMIANKTRITPQIAFWMRD
CenBP1_rP1  -----
CenBP1_rP2  -----
CenBP1_rp3  -----
CenBP1_rP4  -----
CenBP1_rP5  -----
CenBP1_rP6a -----

```

```

CenBP1_Start -----
CenBP3      1665  N-LNQKAVGLSTQQIIKCKKLFNNLFKAFDRIKQRAFTLLEHYGKGI PDDTSFQPSQTSF
CenBP2      1665  NSLNQKAVGLSTQQIIKCKKLFNNLCKAFDRIKQRAFTHLEHYGKGI PDDTSFQPSHSSF
CenBP1_end   239  NATTQKAVSLNLTQI VCKCKL LNNLLKAYDRVRQRAFTNIEHFGRGITDASSFQPSHSSF
CenBP1_rP1  -----
CenBP1_rP2  -----
CenBP1_rp3  -----
CenBP1_rP4  -----
CenBP1_rP5  -----
CenBP1_rP6a -----

```

```

CenBP1_Start -----
CenBP3      1724  LQQTPIK KIKD IFFKSDFDSTIQKNGQKALNAISR VVKVYFKQRFIELMI-----ELG
CenBP2      1725  LQQTPIK ---DAFFKSDFDSIIQKNGQKALNAISR VFKGFLKQRFIEFMI-----ELD
CenBP1_end   299  LQQT PVR ---DSQAKSOME SII LKNSQQVALSTLQRVFRRHLKIRFTELVL IASQCQKLG
CenBP1_rP1  -----
CenBP1_rP2  -----
CenBP1_rp3  -----
CenBP1_rP4  -----
CenBP1_rP5  -----
CenBP1_rP6a -----

```

```

CenBP1_Start -----
CenBP3      1778  DQKLRKVST-----HKKKGAEKLF AILEQNLK LKKQVICYQISQVINIKNIQVNEQGV
CenBP2      1776  DQKQKSWST-----POKKGAEKLF AILEQNLK LKQVICYQISQVLQLELIQVNEQGV
CenBP1_end   356  EQMLKSSIQPTQYKFIHKKMATEK LIGVLE RNLQ LKELVFFNSTIANQ-----SDPDL
CenBP1_rP1  -----
CenBP1_rP2  -----
CenBP1_rp3  -----
CenBP1_rP4  -----
CenBP1_rP5  -----
CenBP1_rP6a -----

```

```

CenBP1_Start -----
CenBP3      1831  LNQINEI INYQQSTQSSSRLESSQLKEQQLKLN EKERMLEGWQEKLR CVAINRLIKALER
CenBP2      1829  LNQINEI INYQQSTQSSSRLELSQIKEQQT KLNEQERMILDQEKLR CMATHRLFKALEK
CenBP1_end   408  LKRMNETIE-ENSR LRDQATNDETINSKDQQL SEQORLIQDLNTR LDRMRGORMIKSLEE
CenBP1_rP1  -----
CenBP1_rP2  -----
CenBP1_rp3  -----
CenBP1_rP4  -----
CenBP1_rP5  -----
CenBP1_rP6a -----

```

```

CenBP1_Start -----
CenBP3      1891  CEDHFVEDAFVAISEYQLK
CenBP2      1889  CEDHFVEDAF LGISEYQLK
CenBP1_end   467  YQDHLVEDGFFAIEEYKKE
CenBP1_rP1  -----
CenBP1_rP2  -----
CenBP1_rp3  -----
CenBP1_rP4  -----
CenBP1_rP5  -----
CenBP1_rP6a -----

```
