# Supplementary material for: Functional diversification of centrins and cell morphological complexity
Source: Oxford University Press journal article supplement (doi:10.1242/jcs.019414), 2007-12-06
Supplement: jcs019414-sup-019414-figs3.pdf [file jcs019414-sup-019414-figs3.pdf]

|              |     |                                                                                                                                      |
|--------------|-----|--------------------------------------------------------------------------------------------------------------------------------------|
| Ptcen_icl1a  | 121 | LFDSRAQVITLKDLEKRVAK-ELGETDDSELCEMIDRAD----S <sub>1</sub> GDAQTFEDFYNMTKKTEA-----                                                    |
| Ptcen_icl1d  | 121 | LFDSRAQVITLKDLEKRVAK-ELGETDDSELCEMIDRAD----S <sub>1</sub> GDAQTFEDFYNMTKKTEA-----                                                    |
| Ptcen_icl1b  | 122 | LFDSRAQVITLKDLEKRVAK-ELGETDDSELCEMIDRAD----S <sub>1</sub> GDAQTFEDFYNMTKKTEA-----                                                    |
| Ptcen_icl1c  | 123 | LFDSRAQVITLKDLEKRVAK-ELGETDDSELCEMIDRAD----S <sub>1</sub> GDAQTFEDFYNMTKKTEA-----                                                    |
| Ptcen_icl1f  | 123 | LFDSRAQVITLKDLEKRVAK-ELGETDDSELCEMIDRAD----S <sub>1</sub> GDAQTFEDFYNMTKKTEA-----                                                    |
| Ptcen8       | 120 | LFDDGGSNTNLNLLKRVSK-ELGETMTABELAEMIERAA---SNG-RETSREDFYNVKRTFM-----                                                                  |
| Ptcen15      | 120 | LFDDGGSNTNLNLLKRVSK-ELGETMTABELAEMIERAA---SNG-RETSREDFYNVKRTFM-----                                                                  |
| Ptcen10      | 116 | LFDDGGSNTNLNLLKRVSK-ELGETMTABELAEMIERAA---SNG-RETSREDFYNVKRTFM-----                                                                  |
| Ptcen12      | 116 | LFDDGGSNTNLNLLKRVSK-ELGETMTABELAEMIERAA---SNG-RETSREDFYNVKRTFM-----                                                                  |
| Ptcen_icl1e  | 116 | LFDDGGSNTNLNLLKRVSK-ELGETMTABELAEMIERAA---SNG-RDTSREDFYNVKRTFM-----                                                                  |
| Ptcen_icl1g  | 116 | LFDDGGSNTNLNLLKRVSK-ELGETMTABELAEMIERAA---SNG-RDTSREDFYNVKRTFM-----                                                                  |
| Ptcen18      | 116 | LFDDGGSNTNLNLLKRVSK-ELGETMTABELAEMIERAA---SNG-RETSREDFYNVKRTFM-----                                                                  |
| Ptcen_icl5a  | 118 | LVDPDTGFDFTNLKRVAK-ELGETNDDELEEMHHEIHILRKT-SPEQTSFEFYEITAPRRY-----                                                                   |
| Ptcen_icl5b  | 118 | LVDPDTGFDFTNLKRVAK-ELGETNDDELEEMHHEIHILRKT-SPEQTSFEFYEITAPRRY-----                                                                   |
| Ptcen_icl6a  | 120 | LVDPDTGFDFTNLKRVAK-ELGETNDDELEEMHHEIHILRKT-SPEQTSFEFYEITAPRRY-----                                                                   |
| Ptcen_icl6b  | 120 | LVDPDTGFDFTNLKRVAK-ELGETNDDELEEMHHEIHILRKT-SPEQTSFEFYEITAPRRY-----                                                                   |
| Ptcen_icl7a  | 113 | LVDTGKGTDKDLEKTSID-EIHLNFKQDIDVILNVAG---YDAEDTAEQSEKYAKLTNRRKIETEVLRTK                                                               |
| Ptcen_icl7b  | 113 | LVDTGKGTDKDLEKTSID-EIHLNFKQDIDVILNVAG---YDAEDTAEQSEKYAKLTNRRKIETEVLRTK                                                               |
| Ptcen_icl1a  | 113 | LVDTGKGTDKDLEKTSID-EIHLNFKQDIDVILNVAG---YEAEDTAEQSEKYAKLVORRQVEQEIYRNK                                                               |
| Ptcen_icl8b  | 113 | LVDTGKGTDKDLEKTSID-EIHLNFKQDIDVILNVAG---YEAEDTAEQSEKYAKLVORRQVEQEIYRNK                                                               |
| Ptcen_icl3a  | 129 | LVDPWNKEGRITWDELKRVVQ-DLGEEMTDEELQHMKRRADL---DDCFTFDDFYNMTOEY <sub>1</sub> GKQ-----                                                  |
| Ptcen_icl3d  | 130 | LVDPWNKEGRITWDELKRVVQ-DLGEEMTDEELQHMKRRADL---DDCFTFDDFYNMTOEY <sub>1</sub> GKQ-----                                                  |
| Ptcen_icl3e  | 128 | LVDPWNKEGRITWDELKRVVQ-DLGEEMTDEELQHMKRRADL---DDCFTFDDFYNMTOEY <sub>1</sub> GKQ-----                                                  |
| Ptcen_icl3f  | 135 | LVDPWNKEGRITWDELKRVVQ-DLGEEMTDEELQHMKRRADL---DDCFTFDDFYNMTOEY <sub>1</sub> GKQ-----                                                  |
| Ptcen_icl3b  | 132 | LVDPWNKEGRITWDELKRVVQ-DLGEEMTDEELQHMKRRADL---DDCFTFDDFYNMTOEY <sub>1</sub> GKQ-----                                                  |
| Ptcen_icl3g  | 131 | LVDPWNKEGRITWDELKRVVQ-DLGEEMTDEELQHMKRRADL---DDCFTFDDFYNMTOEY <sub>1</sub> GKQ-----                                                  |
| Ptcen_icl10a | 144 | QFDLQYKCYHIDDLLEAS-ECNENKDELENI <sub>1</sub> TRACDP---IGN-T <sub>1</sub> RKQGFIRYKSLQKKN-----                                        |
| Ptcen_icl10b | 144 | QFDLQYKCYHIDDLLEAS-ECNENKDELENI <sub>1</sub> TRACDP---IGN-T <sub>1</sub> RKQGFIRYKSLQKKN-----                                        |
| Ptcen_icl11a | 179 | KVDKNNKCFITLQDLQVYKQKKEID <sub>1</sub> EWLAE <sub>1</sub> FRK <sub>1</sub> TDS---NODCKTFEDFYNMTKK <sub>1</sub> V <sub>1</sub> Y----- |
| Ptcen_icl11b | 179 | KVDKNNKCFITLQDLQVYKQKKEID <sub>1</sub> EWLAE <sub>1</sub> FRK <sub>1</sub> TDS---NODCKTFEDFYNMTKK <sub>1</sub> V <sub>1</sub> Y----- |
| Ptcen_icl11c | 179 | KVDKNNKCFITLQDLQVYKQKKEID <sub>1</sub> EWLAE <sub>1</sub> FRK <sub>1</sub> TDS---NODCKTFEDFYNMTKK <sub>1</sub> V <sub>1</sub> Y----- |
| Ptcen_icl9b  | 146 | EFDSGQSKAYEDPKRIND-LVSERYTDOELREMEVADK---DKDGLSWDEKAV <sub>1</sub> V <sub>1</sub> CKEY <sub>1</sub> PNQA-----                        |
| Ptcen_icl9a  | 146 | EFDSGQSKAYEDPKRIND-LVSERYTDOELREMEVADK---DKDGLSWDEKAV <sub>1</sub> V <sub>1</sub> CKEY <sub>1</sub> PNQA-----                        |
| Ptcen_icl9c  | 144 | EFDSGQSKAYEDPKRIND-LVSERYTDOELREMEVADK---DKDGLSWDEKAV <sub>1</sub> V <sub>1</sub> CKEY <sub>1</sub> PNQA-----                        |
