# Supplementary material for: Functional diversification of centrins and cell morphological complexity
Source: Oxford University Press journal article supplement (doi:10.1242/jcs.019414), 2007-12-06
Supplement: jcs019414-sup-019414-figs4.pdf [file jcs019414-sup-019414-figs4.pdf]

#### **Supplemental Figure S4. Aligment of the icl centrin sub-families with their orthologs**

The alignment covers the part of the proteins encompassing residues 29 to 169 of the *Chlamydomonas* Vfl2p centrin. The conserved residues which allow us to assign one centrin isoform to one sub-family are in colour. The alignment of the two *Paramecium* centriolar centrin (Pt-centrin2p and Pt-centrin3)) with their orthologs is also presented for comparison. The conserved residues common to both centriolar centrin sub-families are also coloured. The CLUSTALW alignments are visualized by BOXSHADE. Accession numbers: Cr-Vfl2 = CAA31163; Cp-centrin3 = XP\_625971; Cp-centrin2 = XP\_001388100; Cp-centrin = XP\_627035; Hs-centrin2 = AAP35920; Hs-centrin3 = AAP35334; Pf-centrin2 = XP\_001351001; Pf-centrin = XP\_001348617; Pv-centrin3 = AAKM01002769.1; Pt-centrin3 = XP\_001439003; Pt-centrin2 = XP\_001427485; Ta-centrin3 = XP\_954497; Ta-centrin2 = XP\_954774; Ta-centrin = XP\_955271; Tg-centrin = CB301495; Tt-centrin3 = XP\_001470770; Tt-centrin2 = XP\_001019292; Tt-00689850 = XP\_001026988; Tt-00444870 = XP\_001023350; Tt-00442810 = XP\_001033194; Tt-00670560 = XP\_001026377; Vc-spasmin = AAD00995; Za-spasmin1 = BAC43748; Za-spasmin2 = BAC43749. The accession numbers of the *Paramecium* ICL centrin are as in Table 1. Cr: *Chlamydomonas reinhardtii*; Cp: *Cryptosporidium parvum*; Hs: *Homo sapiens*; Pf: *Plasmodium falciparum*; Pv: *Plasmodium vivax* ; Pt: *Paramecium tetraurelia*; Ta: *Theileria annulata*; Tt: *Tetrahymena thermophila*; Tg: *Toxoplasma gondii*; Vc: *Vorticella convallaria*; Za: *Zoothamnium arbuscula*.
