# Supplementary material for: Functional diversification of centrins and cell morphological complexity
Source: Oxford University Press journal article supplement (doi:10.1242/jcs.019414), 2007-12-06
Supplement: jcs019414-sup-019414-figs5.pdf [file jcs019414-sup-019414-figs5.pdf]

## Supplementary Figure S5. Localization of the peptides identified by mass spectrometry along the protein sequences.

The position and length of the peptides are underlined. The regions matching peptides are highlighted. Grey highlight: regions matching at least one peptide, black highlight: region matching a single peptide, specific for one isotype. A. Localization of the peptides along the PtCenBP1p sequence. A same peptide can match several PtCenBP1p internal repeats, designated rP1 to rP6, because of their high homology. B. Localization of the peptides along the PtCenBP2p and PtCenBP3p sequences. C. Localization of the peptides along the proteins of the ICL1a sub-family. D. Localization of the peptides along the proteins of the ICL1e sub-family. E. Localization of the peptides along the proteins of the ICL3a and ICL3b sub-families. F. Localization of the peptides along the proteins of the ICL5 sub-family. G. Localization of the peptides along the proteins of the ICL7 sub-family. H. Localization of the peptides along the proteins of the ICL8 sub-family. I. Localization of the peptides along the proteins of the ICL9 sub-family. J. Localization of the peptides along the proteins of the ICL10 sub-family. K. Localization of the peptides along the proteins of ICL11 sub-family.

### A. Localization of the peptides along the PtCenBP1p sequence.

Nterm 1 MPPGQLQKNKQQQKNVLTTPQKLELLQENRKLSSHIFNMGNLNGQHNLHRAMLRMRRAMIE

Nterm 61 KKIDVSKISKIKGKIVSQLLRYESHTSLHEAFLRWKVRADPEIVKKAVDQILLNSRLNE

Nterm 121 FNAFHKLKNLLGQKDLQKKMNAKKRKNMCLMNLALFLQKKEFQLKTAAVAALKPKNQDSD

Nterm 181 KMLGLLLWSISSKHRERYLREKFNWWRLYSKVKSDKLQKQLKALERLGDEYNMRNDRDR

Nterm 241 QRLKEVQNISNYQAFQKWRGDLNMFRLKKKFFSVLLKTTFGRLQRCYTRWVDLPDKREN

Nterm 301 DMKKQGMLLITKLTNKADQNKRLVWNSFKAIDDDAKNKKTKVIRELIEVTFNQSYTAFYK

Nterm 361 WANYNTYAKLTETNLRKIKALQASANVTQQLVKFEETFKLFGLSKKAEICSFLNKLILKIQ

Nterm 421 QRQKIDAMRQIENVSMQKKMQEKLDNVNKQEIISRLGDTANKTEKGLLRQVLRKFALLRE

Nterm 481 QQEIKNKYFVRIISTTSGMAMDAFRRWKQLPDAEQQMLQNVSKFQLRLQFLFKQRVKQS

Nterm 541 FDPLKEVYYQGIQSKRLCICKQMLVKQLSAPQRFLRQWQSMNKIYKSVIACQKTNNFFDSL

Nterm 601 QDVLKNNIKAFLYTRKDAEVKEKCLVKLMSSFTNNLMIAFLKWKNYNKQQKISENLGDEK

Nterm 661 KKYMLLNLRQRFIKNDNLNRLRRLRLFYNEQQVNQLIKKIHLRVLQQTQIGQVELSFQKWK

Nterm 721 SLPGDDALKNQAKVSKFAISLGKIAYRFVVKLNSWDQLENNLLDGQAKKFCINKIIAITQ

Nterm 781 SDLKKAFLWLHRKAWEMKMFDFKFSQLNVTLNDQIVKQKLIQWINAGSKVKFFALTEVLR

Nterm 841 FNQNAIEHNLKRKAMVI

rP1 851 RNTISQVWLSFNRWKQLPEENNDLKVQATKFEKSLSKFVFHILKKHSWNPLQEVYDDGL  
rP2 1279 RTQIGAVWDTFNKWKNLPEANP-DDLIKASRFETQLNKFTLHIWRKRTWNPLQEVYDDAQ  
rp3 1706 RTQIGAVWDTFNKWKNLPEANA-DDLIKASRFETQLNKFTLHIWRKRTWNPLQEVYDDAQ  
rP4 2133 RTQIGAVWDTFNKWKNLPEANP-DDLIKASRFETQLNKFTLHIWRKRTWNPLQEVYDDAQ  
rP5 2560 RTQIGAVWDTFNKWKNLPEANP-DDLIKASRFETQLNKFTLHIWRKRTWNPLQEVYDDAQ  
rP6 2987 RTQIGAVWDTFNKWKNLPEANP-DDLIKASRFETQLNKFTLHIWRKRTWNPLQEVYDDAQ

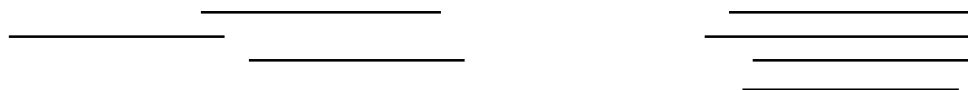

rP1 911 AIKKRAVLLMIKTQESEQQRALDQWNKNVSLIREVERCKVVISLFGLLGSHIKNNIAPLK  
rP2 1339 ALKKRAIILMIKTQESEQQRALDQWNKNVGLMKEVERCKCVIGLFGFIGVHIKNNIAPLK  
rp3 1766 ALKKRAIILMIKTQESEQQRALDQWNKNVGLMKEVERCKCVIGLFGFIGVHIKNNIAPLK  
rP4 2193 ALKKRAIILMIKTQESEQQRALDQWNKNVGLMKEVERCKCVIGLFGFIGVHIKNNIAPLK  
rP5 2620 ALKKRAIILMIKTQESEQQRALDQWNKNVGLMKEVERCKCVIGLFGFIGVHIKNNIAPLK  
rP6 3047 ALKKRAIILMIKTQESEQQRALDQWNKNVGLMKEVERCKCVIGLFGFIGVHIKNNIAPLK

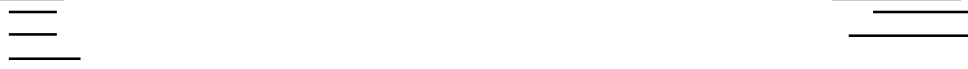

rP1 971 PDEESQKKEKALLRLIGNFDSNLRYFFMKWYNDGKLEKLQGAMTDEKKKLLLEAINNFSK  
rP2 1399 PDEESQKKEKALLRLIGNFDSNLRYFFMKWYNDGKLEKLQGAMTDEKKKLLLEAINNFSK  
rp3 1826 PDEESQKKEKALLRLIGNFDSNLRYFFMKWYNDGKLEKLQGAMTDEKKKLLLEAINNFSK  
rP4 2253 PDEESQKKEKALLRLIGNFDSNLRYFFMKWYNDGKLEKLQGAMTDEKKKLLLEAINNFSK  
rP5 2680 PDEESQKKEKALLRLIGNFDSNLRYFFMKWYNDGKLEKLQGAMTDEKKKLLLEAINNFSK  
rP6 3107 PDEESQKKEKALLRLIGNFDSNLRYFFMKWYNDGKLEKLQGAMTDEKKKLLLEAINNFSK

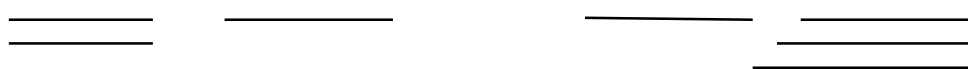

rP1 1031 NNDFARLRAILAKFRRNSSITAVQDRFFAKLFATQFGGAIKAFQKWKNLPEPVNTEQLKN  
rP2 1459 NNDFARLRAILAKFRRNSSITAVQDRFFAKLFATQFGGAIKAFQKWKNLPEPVNTEQLKN  
rp3 1886 NNDFARLRAILAKFRRNSSITAVQDRFFAKLFATQFGGAIKAFQKWKNLPEPVNTEQLKN  
rP4 2313 NNDFARLRAILAKFRRNSSITAVQDRFFAKLFATQFGGAIKAFQKWKNLPEPVNTEQLKN  
rP5 2740 NNDFARLRAILAKFRRNSSITAVQDRFFAKLFATQFGGAIKAFQKWKNLPEPVNTEQLKN  
rP6 3167 NNDFARLRAILAKFRRNSSITAVQDRFFAKLFATQFGGAIKAFQKWK-NPEPVNTEQMKN

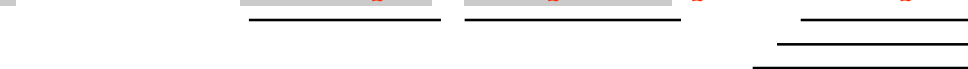

rP1 1091 ARKFERTLDILFRSHLKVSFDPLKEDYMDALNIKRMCLRKLFEKSMSAHKRLFLLWAQQN  
rP2 1519 ARKFERTLDILFRSHLKVSFDPLKEDYMDALNIKRMCLRKLFEKSMSAHKRLFLLWAQQN

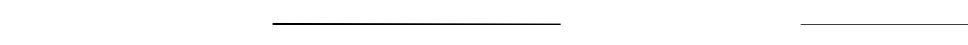

rp3 1946 ARKFERTLDILFRSHLKVSFDPLKEDYMDALNIKRMCLRKLFEKSMSAHKRLFLLWAQQN  
rP4 2373 ARKFERTLDILFRSHLKVSFDPLKEDYMDALNIKRMCLRKLFEKSMSAHKRLFLLWAQQN  
rP5 2800 ARKFERTLDILFRSHLKVSFDPLKEDYMDALNIKRMCLRKLFEKSMSAHKRLFLLWAQQN  
rP6 3227 ARKFERTLDLLFRGRVKASFEPLKDVYQEGNSK~~LY~~CLRKLMTLAMGQNKRLFLYWRDIN

rP1 1151 RQAKQIEVCRLTTALFVGLAQIVTANVQPIMQNPREAQAKEKALHLIFQGQAENLSRAFF  
rP2 1579 RQAKQIEVCRLTTALFVGLAQIVTANVQPIMQNPREAQAKEKALHLIFQGQTENLLRAFF  
rp3 2006 RQAKQIEVCRLTTALFVGLAQIVTANVQPIMQNPREAQAKEKALHLIFQGQTENLLRAFF  
rP4 2433 RQAKQIEVCRLTTALFVGLAQIVTANVQPIMQNPREAQAKEKALHLIFQGQAENLSRAFF  
rP5 2860 RQAKQIEVCRLTTALFVGLAQIVTANVQPIMQNPREAQAKEKALHLIFQGQAENLSRAFF  
rP6 3287 RLHKS~~IETC~~Y~~TTNLF~~Q~~T~~L~~AFT~~L~~A~~G~~H~~V~~Q~~S~~I~~FKPN~~K~~Q~~Q~~E~~S~~V~~L~~N~~K~~M~~L~~L~~N~~Y~~N~~---NTL~~R~~W~~A~~F~~V~~

rP1 1211 LWRNRAQQERMNQNFEDAL~~T~~I~~E~~K~~K~~K~~Q~~L~~T~~E~~Q~~L~~V~~Q~~F~~E~~N~~G~~N~~K~~F~~A~~L~~Y~~R~~Q~~I~~L~~A~~K~~F~~S~~L~~A~~H~~K~~K~~E~~K~~L~~V~~  
rP2 1639 KWRNWSQQDRMNDNLLNQLQSEQRKELVDRLQGFCHGNKLNLYRLI~~L~~A~~K~~F~~S~~L~~A~~H~~K~~K~~E~~K~~L~~V  
rp3 2066 KWRNWSQQDRMNDNLLNQLQSEQRKELVDRLQGFCHGNKLNLYRLI~~L~~A~~K~~F~~S~~L~~A~~H~~K~~K~~E~~K~~L~~V  
rP4 2493 LWRNRAQQERMNQNFEDAL~~T~~I~~E~~K~~K~~K~~Q~~L~~T~~E~~Q~~L~~V~~Q~~F~~E~~N~~G~~N~~K~~F~~A~~L~~Y~~R~~Q~~I~~L~~A~~K~~F~~S~~L~~A~~H~~K~~K~~E~~K~~L~~V~~  
rP5 2920 LWRNRAQQERMNQNFEDAL~~T~~I~~E~~K~~K~~K~~Q~~L~~T~~E~~Q~~L~~V~~Q~~F~~E~~N~~G~~N~~K~~F~~A~~L~~Y~~R~~Q~~I~~L~~A~~K~~F~~S~~L~~A~~H~~K~~K~~E~~K~~L~~V~~  
rP6 3347 HWNNQAKQAKIQS----QLDDEKKKLLLFALHRNLR~~T~~N~~D~~Q~~G~~K~~L~~R~~D~~I~~L~~R~~K~~F~~S~~K~~E~~R~~Q~~K~~Q~~A~~L~~I

rP1 1271 LQINARIL  
rP2 1699 LQINARIL  
rp3 2126 LQINARIL  
rP4 2553 LQINARIL  
rP5 2980 LQINARIL  
rP6 3407 KKI~~Q~~I~~Q~~L~~L~~

Cterm 3422 VGQIEVSFQKWKALPETKALDQMKASIFEKSLNRFKIH~~MVR~~~~K~~SAYNQLYNIYLDGQAKQK

Cterm 3482 YAINKMLYNCMSAQKKAFLKWKYKVVVEFSKAAEAFDISDKKKLAIQ~~L~~F~~Y~~Q~~H~~KMNQLNVA~~F~~V

Cterm 3542 ~~E~~W~~K~~R~~L~~S~~S~~H~~L~~T~~N~~K~~Q~~E~~T~~A~~Q~~E~~R~~E~~V~~R~~L~~K~~R~~E~~A~~I~~L~~L~~F~~Q~~N~~F~~A~~Q~~I~~R~~L~~R~~I~~Y~~F~~Q~~R~~W~~N~~I~~R~~A~~V~~K~~K~~N~~M~~I~~S~~V~~F~~N

Cterm 3602 AIQKLLCTERMMQDRELIKEALDIWRGPKLQ~~N~~Q~~W~~F~~Q~~R~~V~~A~~E~~M~~I~~A~~K~~N~~T~~R~~I~~T~~P~~Q~~I~~A~~F~~W~~R~~M~~R~~D~~N~~A

Cterm 3662 TTQKAVSLNTLQIVKCKKLINLLKAYDRVRQRAFTNIEHFGRGITDASSFQPSHSSFLQ

Cterm 3722 QTPVRDSQAKSQMESIILKNSQ~~Q~~VALSTLQ~~R~~V~~F~~RRHLKIRFTELVLIASQCQKLGEQMLK

Cterm 3782 SSIQPTQYKFIHKKMATEKLIGVLERNLQ~~L~~KELVFFNSIANQSDPDLLKRMNELIEENS~~R~~

Cterm 3842 ~~L~~R~~D~~Q~~A~~T~~N~~D~~E~~T~~I~~N~~S~~K~~D~~Q~~Q~~I~~S~~E~~Q~~Q~~R~~L~~I~~Q~~D~~L~~N~~T~~R~~L~~D~~R~~M~~R~~G~~Q~~R~~M~~I~~K~~S~~L~~E~~E~~Y~~Q~~D~~H~~L~~V~~E~~D~~G~~F~~F~~A~~I~~E

Cterm 3902 EYKKE\*

## B) Localisation of the peptides along CenBP2 and CenBP3 sequences.

CenBP3 1 **MLSDSNNRLSTQLSPKLGIIIVSQLIKTQSSLSIQDAFIRWQVRTNPEIVKKA**VDKILLN  
CenBP2 1 **MLSDTNNQLSTKLSPKLGIIIVSQLIKTQQNLTIQDAFIRWQVRTNPEIVKQ**AVDKILLN

CenBP3 61 **SKLNQFN**A**FHKLKFL**LG-YQKLLIRMNA**KKKKNLSI**INLALF**VQK**KELQ**LKRQAIESIKP**  
CenBP2 61 **SKLNQFN**A**FHKLKFL**LGT**KQPKEARMNAR**KKKKNLS**LI**INLALF**IQK**KELQ**LKRQAIESIKP**

CenBP3 120 **TSQDTNKMLG**LLI**WSSIS**SKYRERYLREKFN**WWKLI**AK**IK**SNKLEKQ**LKALE**RLGDEYNMR  
CenBP2 121 **TSQDSNKMLG**LLI**WSSIS**SKYRERYLREKFN**WWKLI**AK**M**SNKLEKQ**LKALE**ILGDEYNMR

CenBP3 180 **NDRLDR**QRLKEAFEIWRGDLLNFRL**KKKFF**AVLLK**TT**FGR**LQ**RCYTRWVDL**PK**KRENDIK  
CenBP2 181 **NDRLDR**SRLKEAFEIWRGDLLNFRL**KKKFF**AVLLK**TT**FGR**LQ**RCYTRWVDL**PK**KRENDIK

CenBP3 240 **KQGLLL**INKLGNKVDQNKRLVWNA**FKDI**HDEAKN**KKTK**VIRELIEVTFNQSYTAFYKWAN  
CenBP2 241 **KQGLLL**INKLGNKVDQNKRLVWNA**FKDL**HDEAKN**KKTK**VIRELIEVTFNQSYTAFYKWAN

CenBP3 300 **YNTYAKLT**ETNLK**IKS**FQOSANVTHQ**L**VKQ**ET**FKLFNL**SKM**Q**IC**SFLDKI**IL**KL**QQ**RQ  
CenBP2 301 **YNTYAKLT**ETNLK**IKS**LQOSANVTHQ**L**VKQ**ET**FKLFNL**SKM**Q**IC**SFLDKI**IL**KL**QQ**KQ

CenBP3 360 **KLDSLR**QIENYCVQKK**MEE**KL**N**INKQDL**IS**RL**KD**TANKTEKGL**LKQ**V**L**KK**FS**LN**RT**TQE  
CenBP2 361 **KLDALR**QIENYCVQKK**MEE**KL**NN**INKQDL**I**AR**LK**E**T**ANKTEKGL**LKQ**I**L**RR**FQ**IN**RE**TQE

CenBP3 420 **IKNKYF**GRILLSVNGQLIDAFR**KW**KTLPNP**ND**INNIQKASK**FQ**IK**LQ**MFITNK**R**KQAYDP  
CenBP2 421 **IKNKYF**GRILLSVNGQLID**S**FR**KW**KILP**NP**DDINNIQK**V**SK**FQ**M**KL**Q**L**FIVN**KH**KQAYDP

CenBP3 480 **LKYLYY**DALQKKR**FC**IRQLFSVTMSAPQRY**L**KQWQ**N**VAKVYK**SV**VACQKTNNLFYSL**ALI**  
CenBP2 481 **LKYLYY**EALQKKR**FC**IRQLFSVTMSAPQRY**I**KQWQ**N**VAKVYK**SV**VACQKTNNLFYSL**AMI**

CenBP3 540 **IQSNLL**TFVQ**N**KKD**VD**IK**EK**CIQKILASQHSN**L**AIAFF**K**W**KS**HN**KQ**E**Q**ILERLGDEK**M**KF  
CenBP2 541 **LQSNLL**AF**I**Q**N**KKD**VD**IK**EK**CIQKILASQHSN**L**AIAFF**R**W**KS**Q**N**K**Q**Q**Q**ILERLGDEK**M**KF

CenBP3 600 **LILNL**KKFLE**ND**KKQRLRRALNLF**H**Q**LQ**VA**Q**QIKKINLRLM**Q**TV**V**GQV**SS**FSFQKW**Y**LP  
CenBP2 601 **LILNL**KKFLE**ND**KKQRLRRALNLF**N**SN**LQ**LA**Q**QIKKINLRLM**Q**TV**I**GQV**TS**FSFQKW**Y**LP

CenBP3 660 **EDK**VNGSTAKVSK**F**MI**S**LGRVAYR**F**VKVNSW**N**IM**E**DY**LL**DGQAK**K**KYCINK**I**ISVGQSD**L**  
CenBP2 661 **EDR**VNGKT**V**KVSK**F**MI**S**LGRVAYR**F**VKVNSW**N**I**E**DD**LL**E**G**QAK**K**KYCINK**I**IFSVGQSD**L**

CenBP3 720 **KTAFL**I**W**HRR**S**WEM**K**MF**D**Q**F**SQ**L**NVTLN**D**E**I**IK**Q**RLINW**I**NSGN**K**V**K**HYALIE**I**L**KRFHQ**  
CenBP2 721 **KTAFL**S**W**HRR**S**WEM**K**MF**D**Q**F**SQ**L**NVTLN**D**E**I**IK**Q**RL**V**NW**I**NS**G**Y**K**V**K**HYALIE**I**L**KRFHQ**

CenBP3 780 **NAESHNLRR**KALAI**I**HRNTISQV**W**ISFN**K**WKQ**I**PE**H**DYS**L**TK**V**TK**F**EQ**S**IN**R**FLIR**Q**AK  
CenBP2 781 **NAQSYN**LRRKALAI**I**HRNTISQV**W**ISFN**K**WKQ**I**PE**L**DYS**L**AK**V**TK**F**EQ**Q**F**NH**FLIR**Q**TK

CenBP3 840 **KKTWNPLNEIYD**DALAI**K**KRAV**LL**LV**K**T**Q**E**S**E**Q**Q**Q**A**L**S**K**W**N**KNVALIQ**E**VER**C**KSV**I**LL**F**

CenBP2 841 KKIWNPLYEIIYDDALAIKKRAVLLLIKTQESEQQKALSNNWNKNVSLIQEVERCKSVILLF  
 CenBP3 900 KFGVDQIQCNLQIMQPNQESRLKEKALLKIIGGNYDNIRYFFMRWRNYLKFERLQAIEGE  
 CenBP2 901 KFGVDQIQFNLQIMQPNQESRLKEKALLKIIGGNYDNIRYFFMRWTNYLKFERTQAIEGE  
 CenBP3 960 KKEFLIRQIGFFYRNNMKSCLRRLALSFKFRNSVLSAVQQKFFSRLFSTKFGGAIVAFQKW  
 CenBP2 961 KKEFLIRQIGFFYRNNMKSCLRRLALSFKFRNSVLSAVQQKFFSKLRFSTKFGGAIVAFQKW  
 CenBP3 1020 KNLFDIQNYENVKKGRLEKLLLENLYRGRIKLSYDPLKDEYQEAMNKKMHCIRKLIILGM  
 CenBP2 1021 KNLPEIQNFENLKKGRLEKILENLYRGRIKLSYDPLKDEYQEAMNKKLHCIRKLIILGM  
 CenBP3 1080 GSNKRLFLSWRNTNLLLSIETCKQTTNFFQTLSTLTLSGNVQVIFKTNQLQEKVFEKMLS  
 CenBP2 1081 GLNKRLFLQWRNTNLLLSIETCKQTTNFFQTLALTLTLSGNVQVIFKTNQLQEKVFEKMLS  
 CenBP3 1140 QYNNLLRWAFIKWNNQAKSDRIASLMDKETRKFLLFALQRNLKHNKIGQLRDILRNFNDR  
 CenBP2 1141 KYNNLLRWGFIKWNNQAKSAKIASLMDQEKRKFLLFALQRNLKHNQNGQLRDILRKFNDR  
 CenBP3 1200 RNRINLIKKIQLKFLHTFAGQVETSFLKWKQLPDSNLKQASRFEQKLNFSFKIQILRKSS  
 CenBP2 1201 RSRQNLIKKIQLKLLHTFAGQVETSFLKWKQLPDPNSLKQASIFEQKLNFSFKLQVLRKSS  
 CenBP3 1260 FKYLQNIYQDGQAKQKYAINKLMFNCMSVEKKVFLQWNKVSELQKTEERASKVMGFFGSI  
 CenBP2 1261 FKYLQNIYQDGQAKQKFAINKLLFNCMSAEKKAFLQWNVSELQKTEQRASKVFSFFGSI  
 CenBP3 1320 NKIQQNHMYFFFEDQIKELKKQEELVRLLEKWEEMFKDSYQKWKQTQAKLDDLASQNRQK  
 CenBP2 1321 NKIQQNHMYFFFEDQIKELKKQEELVRLLEKWEEDMFKDSYQKWKQTQAKLDDLASQNRQK  
 CenBP3 1380 QKFSIIIEILKDYIQNKKNYNLRLILRKFSNSNKSQKAVNKFLLGISHSSIGQLHNSFQMW  
 CenBP2 1381 QKFSIIIEILKDYIQNKKNYNLRLILRKFSNSNQRQKAVNKFLLGISNSSIGQLHNSFQMW  
 CenBP3 1440 RRLPEPQKTKQGYIFEKKIFSLFRKQLLQSFDFGLQDIYFQALNKKRRVLLLLVVRTTKSQQ  
 CenBP2 1441 RRLPEPQKTKQGYIFEKKLFGFRKQLLQSFDFGLQDLYFQALNKKRRVLLLLVVRTTKSQQ  
 CenBP3 1500 QQAVQRWRDALNQMNQQELQNVQENRKLAIQLFYQHKNQNLNVAFIEWRDTIRLHTNKQE  
 CenBP2 1501 QQSVQRWRDAINQMNQQELQNVQENRKLAIQLFYQHKNQNLNVAFIEWRDTIRLHTNKQE  
 CenBP3 1560 NKTQRDERLKKEAILLFQNYAYVRLRVYFTQWKIRAVKRNMIQICQAIQRMICLNRFQEK  
 CenBP2 1561 NKTQKEERLKKEAILLFQNYAYVRLRVYFTQWKIRAVKRNMIQICQAIQRMICLNRFQEK  
 CenBP3 1620 AMKKYVMDIWKGQPSKNKWFKRVADIIAKNSKISKQIAYWRMRDN-LNQAAGVGLSTQQII  
 CenBP2 1621 AIKKYVMDVWKGQPSKNKWFKRVADIIAKNSRISKQVAYWRMRDNLNQAAGVGLSTQQII  
 CenBP3 1679 KCKKLFNNLFKAFDRIKQRAFTLLEHYGKGIPTDTSFQPSQTSFLQQTPIKIKIDTFFKS  
 CenBP2 1681 KCKKLFNNLCKAFDRIKQRAFTLLEHYGKGIPTDTSFQPSHSSFLQQT---PIKDAFFKS

CenBP3 1739 DFDSILQKNGQK**M**ALNAISR**V**V**K**V**Y**FKQRFIELMIELGDQ**K**L**R**KV**S**THK**K**KGAEK**L**FAIL  
CenBP2 1738 DFDS**I**I**Q**KNGQ**K**LALNAISR**V**FK**G**FL**K**QRFIEFMIELDDQ**K**Q**K**SW**S**TP**Q**KKGAEK**L**FAIL

CenBP3 1799 EQNLK**L**K**K**Q**V**IC**Y**Q**I**SQ**V**IN**I**KN**I**Q**V**NEQ**G**V**L**NQ**I**NE**I**IN**Y**Q**Q**ST**Q**S**S**R**L**ESS**Q**L**K**EQ**Q**  
CenBP2 1798 EQNLK**L**K**Q**V**I**C**Y**Q**I**SQ**V**L**Q**EL**I**Q**V**NEQ**G**V**L**NQ**I**NE**I**IN**Y**Q**Q**ST**Q**S**A**S**R**LE**L**S**Q**I**K**EQ**Q**

CenBP3 1859 L**K**LNE**K**ER**M**LE**G**W**Q**E**K**L**R**C**V**AIN**R**L**I**KALE**R**CE**D**H**F**VE**D**A**F**V**A**I**S**E**Y**Q**L**K  
CenBP2 1858 T**K**LNE**Q**ER**M**IL**D**L**Q**E**K**L**R**C**M**A**I**H**R**L**F**KALE**K**CE**D**H**F**VE**D**A**F**L**G**I**S**E**Y**Q**L**K

### C) Localisation of the peptides along the proteins of ICL1a family

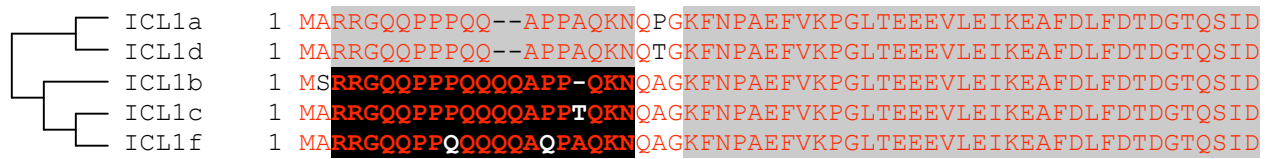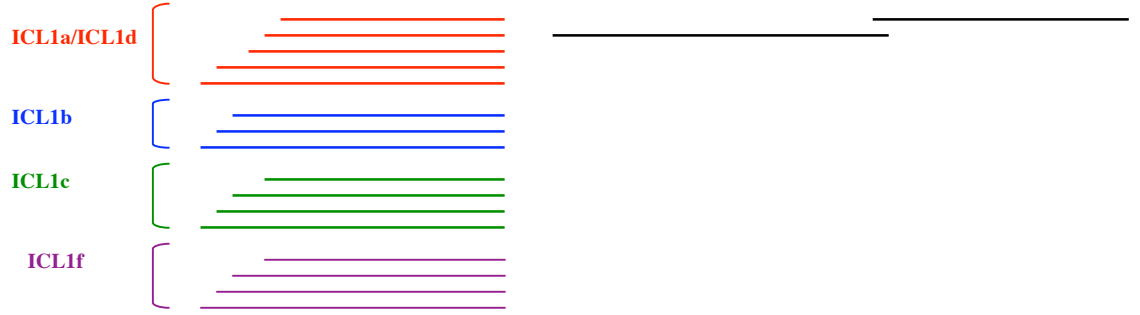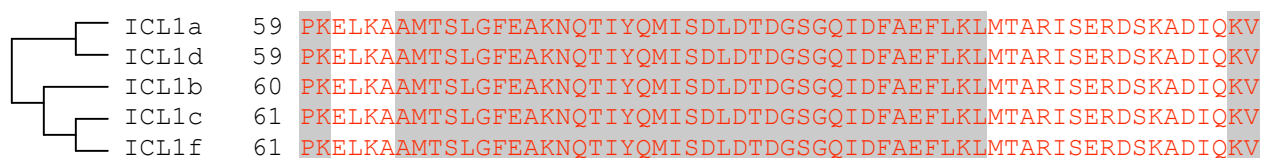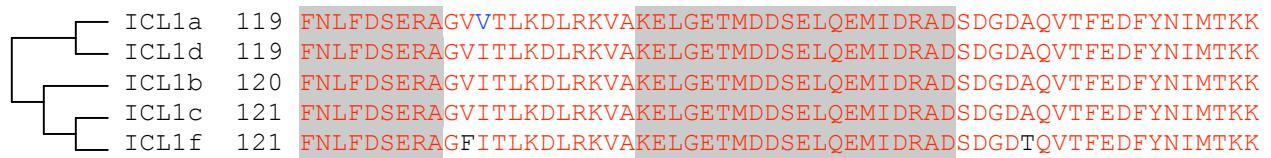

ICL1a 179 TFA  
 ICL1d 179 TFA  
 ICL1b 180 TFA  
 ICL1c 181 TFA  
 ICL1f 181 TFA



## D) Localisation of the peptides along the proteins of ICL1e family.

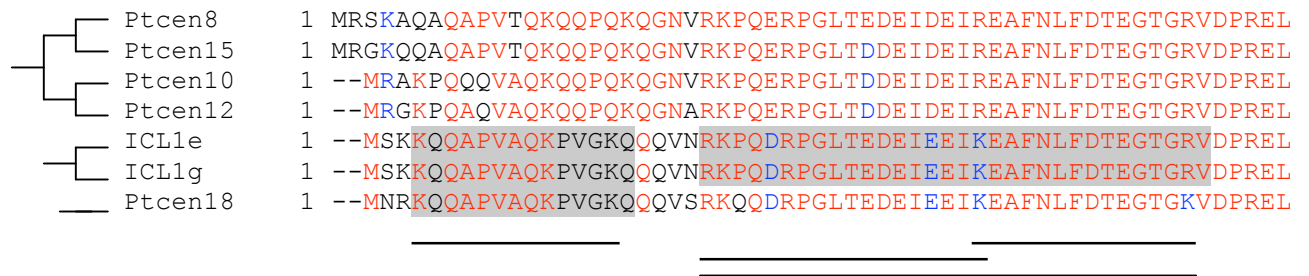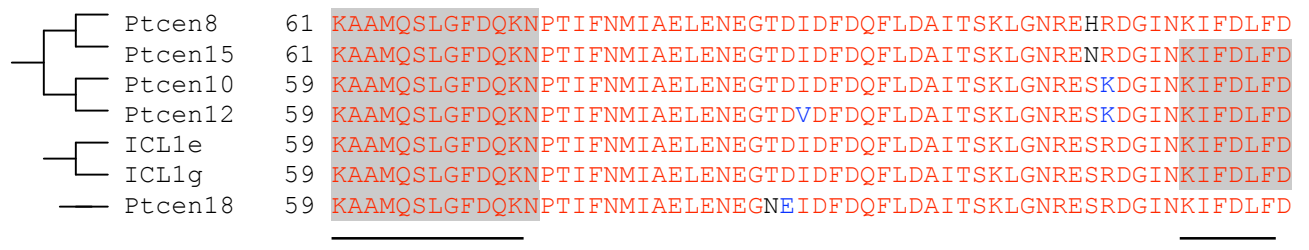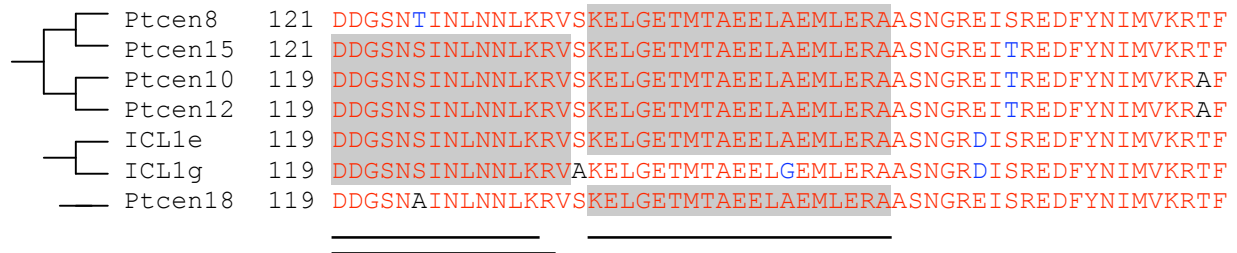

### E) localisation of the peptides along the proteins of ICL3a and ICL3b families.

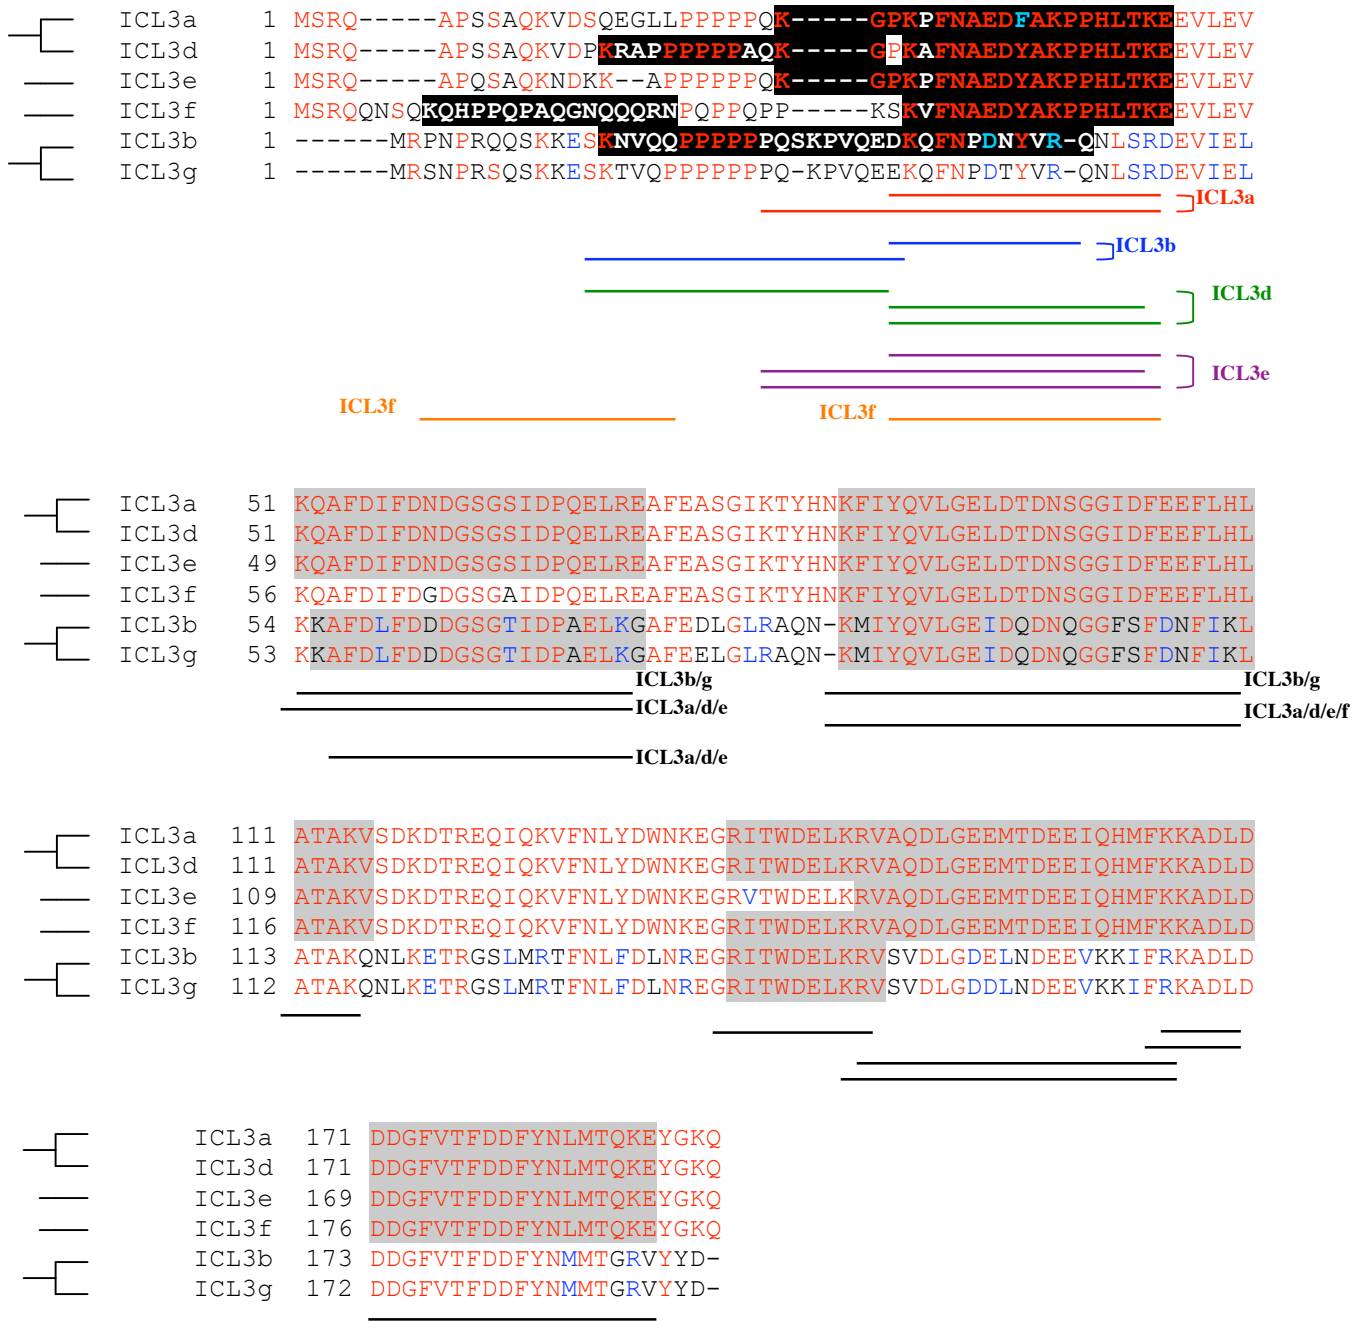

## F) Localisation of the peptides along the proteins of ICL5 family.

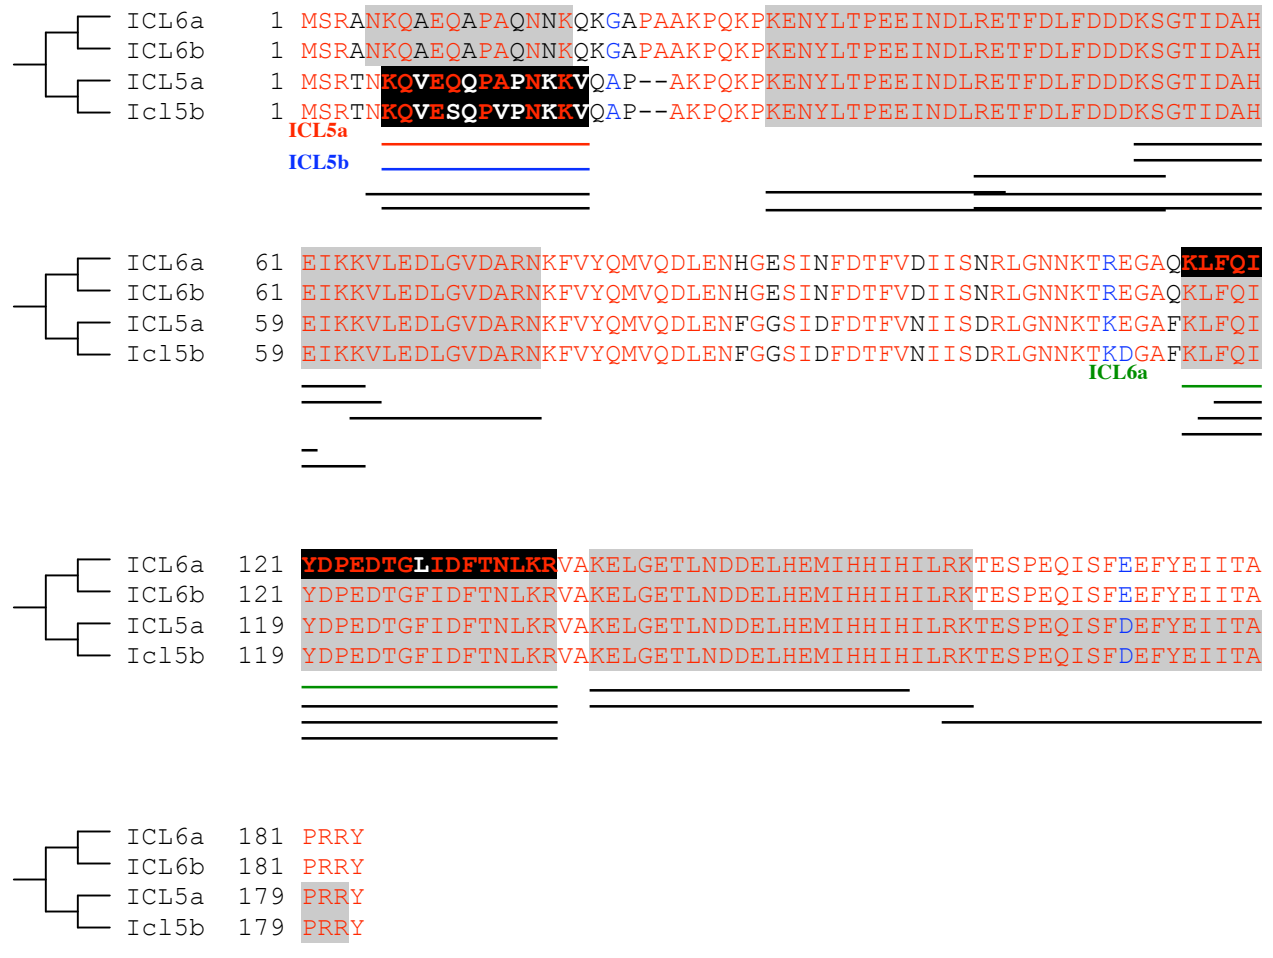

### G) Localisation of the peptides along the proteins of ICL7 family.

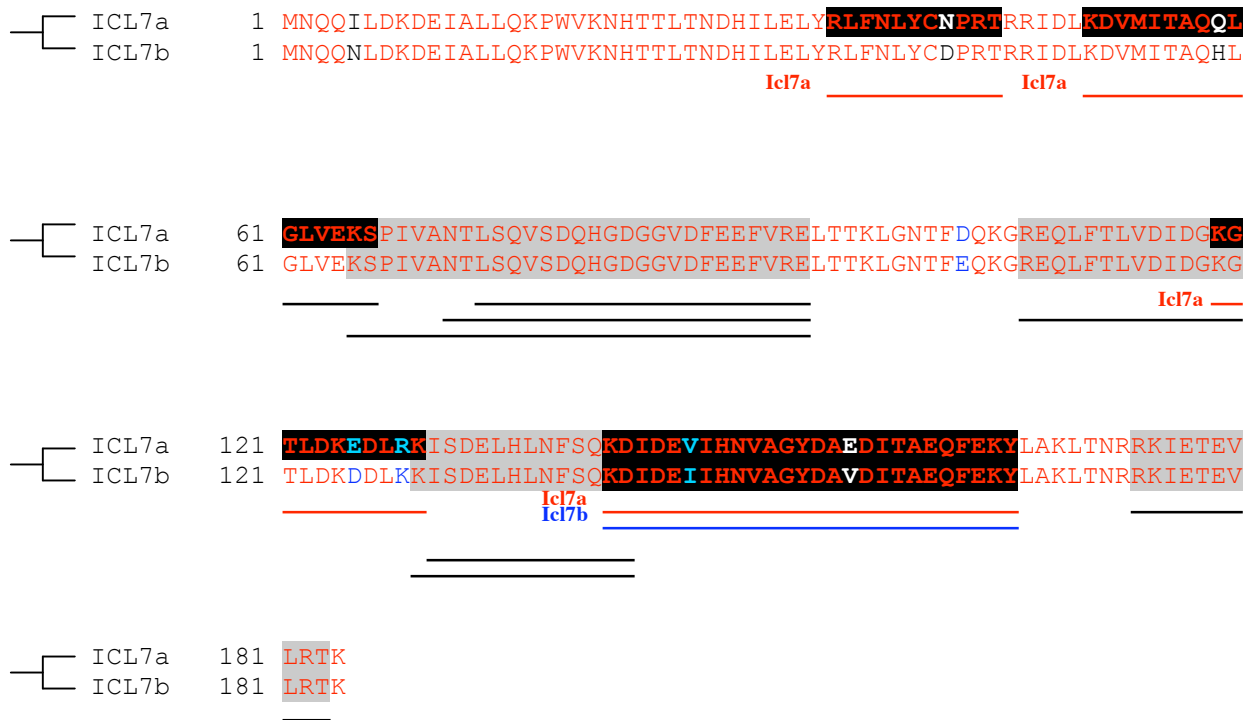

## H) Localisation of the peptides along the proteins of ICL8 family.

|       |     |                                         |                         |
|-------|-----|-----------------------------------------|-------------------------|
| ICL8a | 1   | MSRREQIEKDKQALLAKPWVKNHPIFTYDHIAEFYEMF  | ILYAEPRTKKADVRDILVTAKT  |
| ICL8b | 1   | MSRRDQIEKDKQALLAKPWVKNHPIFTYDHIAEFYEMF  | VLYAEPRTKKADVRDILVTAKT  |
| —     |     |                                         |                         |
| ICL8a | 61  | LGLTDKFPPIIAHALDDLASSYDDAVDFETFISDLTAKL | GNPFDQKGRVQLFKLIDVDGKG  |
| ICL8b | 61  | LGLTDKFPPIIAHALDDLASSYDDAVDFETFISDLTAKL | GH PFDQKGRVQLFKLIDVDGKG |
|       |     |                                         |                         |
| ICL8a | 121 | TLDKSDLHKISEELRFNLTEDDIEEIIHNVAGYEADV   | TEEKFEKYLGKRVQRRQVEQEI  |
| ICL8b | 121 | TLDKSDLHKISEELRFNLTEDDIEEIIHNVAGYEADV   | SEKFEKYLGKRVQRRQVEQEI   |
|       |     |                                         |                         |
| ICL8a | 181 | YRNK                                    |                         |
| ICL8b | 181 | YRNK                                    |                         |
| —     |     |                                         |                         |

## D) Localisation of the peptides along the proteins of ICL9 family.

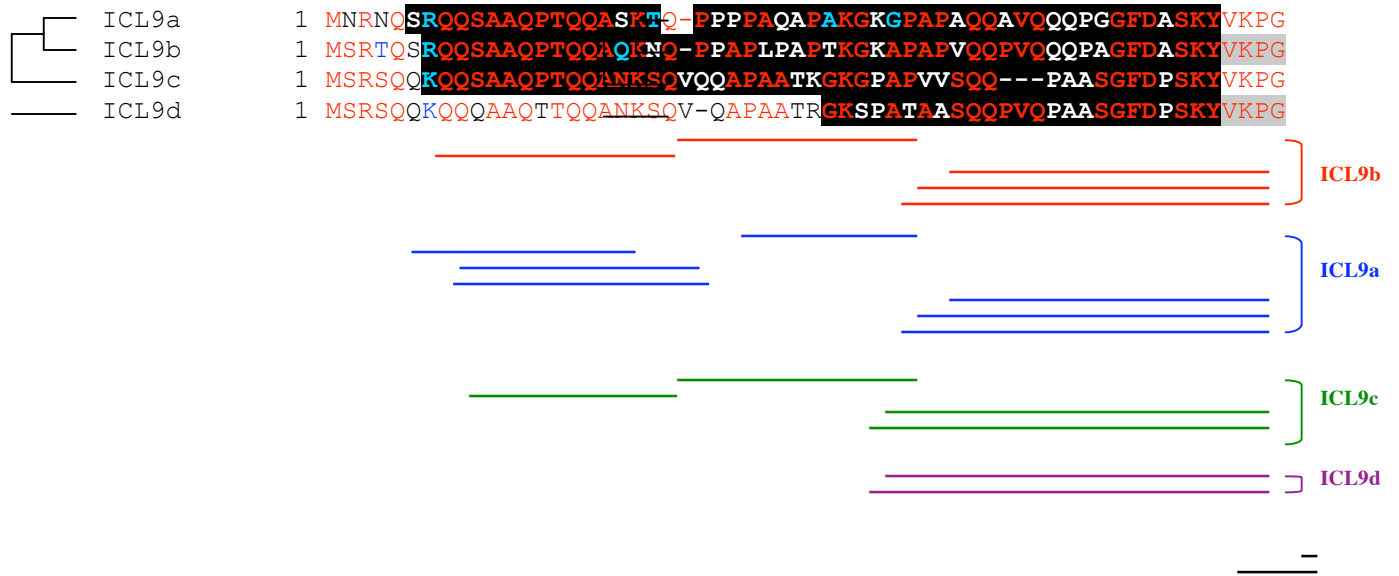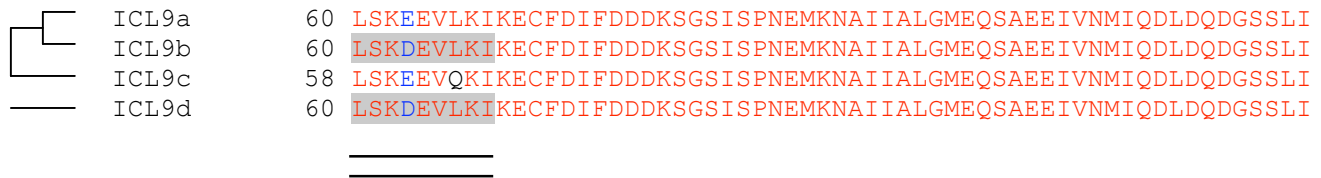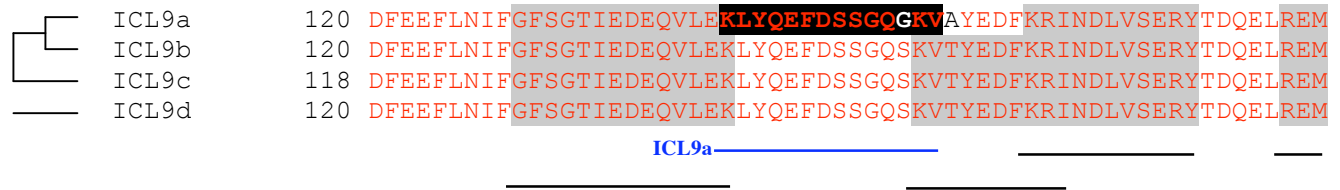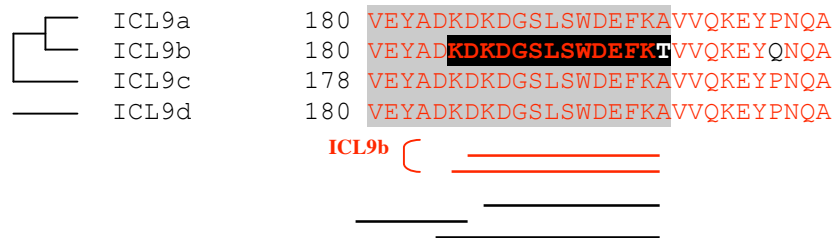

## J) Localisation of the peptides along the proteins of ICL10 family.

|       |        |     |                                                               |
|-------|--------|-----|---------------------------------------------------------------|
| —┐    | ICL10a | 1   | MNRKKNTTSVPTLPQSKINQSLLVPPPQIMSPNQSYSTYIPPEPKFDPNDYITGSTTKRD  |
|       | ICL10b | 1   | MNRKKNTTSVPTLPQSKVNPQYLAPPPQQLSPNQSYSTFIPPEPKFDPNDYITGSTTKRD  |
| <hr/> |        |     |                                                               |
| —┐    | ICL10a | 61  | IILYKEIFDFLDSNNGVIQPMDLRKAFASAGKYQPKKQIIYQMIADFDQDQSGIIEFRE   |
|       | ICL10b | 61  | IILYKEIFDFLDSNNGVIQPMDLRKAFASAGKYQPKKQIIYQMIADFDQDQSGIIEFRE   |
| <hr/> |        |     |                                                               |
| —┐    | ICL10a | 121 | FVRMMSMHPGEKDTDEDFENIFYQFDLDYKGYITIDDLREMASECNENLKDEDLENIKA   |
|       | ICL10b | 121 | FVRMMSMNPGEKDTDEDFENIFYQFDIDYKGYISIDDLREMASECNENLKDEDLQNI IQS |
| <hr/> |        |     |                                                               |
| —┐    | ICL10a | 181 | CDPEGNGTIRKQGFIRYMKSLQKKN                                     |
|       | ICL10b | 181 | CDPEGNGTIRKQAFIRYMKSAQKKR                                     |
| <hr/> |        |     |                                                               |

### K) Localisation of the peptides along the proteins of ICL11 family.

|  |        |   |                                                                                                          |
|--|--------|---|----------------------------------------------------------------------------------------------------------|
|  | ICL11a | 1 | MKNQRK <b>SQSPFRTTQ</b> SIMRDS <b>PNTQLDESSISTNRIPQ</b> NRESTRARMKINQSHNN <b>ALAQQ</b>                   |
|  | ICL11b | 1 | MRNQRK <b>SQSPFRTN</b> QSVMRDS <b>PNTQLDESSISTNRV</b> PQNRESTRARMKINQSHNN <b>ALAQQ</b>                   |
|  | ICL11c | 1 | MRNQITSH <b>SPFRTTQ</b> SI <b>IRDS</b> PH <b>TQLDES</b> RI <b>S</b> NNRVPQNRES <b>MRARMLINQSHNNIQ</b> NG |

|  |        |    |                                                                      |
|--|--------|----|----------------------------------------------------------------------|
|  | ICL11a | 61 | GQIRKQIANE <b>RASANGGNPNEFNPKK</b> FVTKDLKESDIIDIKQVFDYDSEQAGILSPNDL |
|  | ICL11b | 61 | GQIRKQIANERTSAKGGNPNEFNPKKFVTKDLKESDIIDIKQVFDYDSEQAGILSPNDL          |
|  | ICL11c | 61 | QQVRKQIANERTQSKGGNPNEFNPKKF <b>ITK</b> ELKESDIIDIKQVFDYDSEQAGILSPNDL |

|  |        |     |                                                                                                                             |
|--|--------|-----|-----------------------------------------------------------------------------------------------------------------------------|
|  | ICL11a | 121 | EQL <b>L</b> SSCGYHPTKETLYE <b>I</b> FSELDEDELGGITFEYFL <b>G</b> ILNQDKSKSERKDTIRRVYRKY                                     |
|  | ICL11b | 121 | EQL <b>L</b> TSFGYHPTKETLYE <b>I</b> FSELDEDELGGITFEYFL <b>Q</b> ILNQDKSKSERKDTIRRVYRKY                                     |
|  | ICL11c | 121 | EQL <b>L</b> ISFGYHPSKETLYE <b>I</b> FSELDE <b>E</b> ELGGITF <b>Q</b> YFL <b>A</b> ILNQDK <b>T</b> KSE <b>K</b> KDVIRRVYRKY |

|  |        |     |                                                                                                                                   |
|--|--------|-----|-----------------------------------------------------------------------------------------------------------------------------------|
|  | ICL11a | 181 | DKNNKGFITLQDLRQVVYKDLKEE <b>I</b> DEEVLAE <b>I</b> FKKTD <b>S</b> NQDGKMTFEDFY <b>N</b> VM <b>T</b> KKV <b>Y</b>                  |
|  | ICL11b | 181 | DKNNKGF <b>V</b> TLQDLRQVVYKDLKEE <b>I</b> DEEVLAE <b>I</b> FKKTD <b>S</b> NQDGKMTFEDFY <b>N</b> VM <b>T</b> KKV <b>Y</b>         |
|  | ICL11c | 181 | DKSNK <b>G</b> YITLQDLRQVVYKDLKE <b>D</b> IDEEVLAE <b>I</b> F <b>R</b> KT <b>S</b> NQDGKMTFEDFY <b>N</b> V <b>I</b> TKKV <b>Y</b> |
