# Supplementary material for: Functional diversification of centrins and cell morphological complexity
Source: Oxford University Press journal article supplement (doi:10.1242/jcs.019414), 2007-12-06
Supplement: jcs019414-sup-019414-tables1.pdf [file jcs019414-sup-019414-tables1.pdf]

**Table S1. Proteomic analysis of the ICL: protein subfamilies identified by more than two peptides**

| Protein subfamily | Protein size | Peptides (per family) | Subfamily members | Peptides (per gene) | Gene specific peptides | ESTs         |
|-------------------|--------------|-----------------------|-------------------|---------------------|------------------------|--------------|
| PtCenBP1          | 3903 AA      | 43                    | PtCenBP1          |                     |                        | 8            |
| ICL9              | 209 AA       | 30                    | ICL9a             | 13                  | 8                      | 11           |
|                   |              |                       | ICL9b             | 14                  | 7                      | 1            |
|                   |              |                       | ICL9c             | 11                  | 4                      | 7            |
|                   |              |                       | ICL9d             | 11                  | 2                      | 0            |
| ICL1a             | 181 AA       | 25                    | ICL1a             | 14                  | 0*                     | 4            |
|                   |              |                       | ICL1d             | 14                  | 0*                     | 5            |
|                   |              |                       | ICL1b             | 12                  | 3                      | 6            |
|                   |              |                       | ICL1c             | 13                  | 4                      | 6            |
| ICL3a             | 193 AA       | 20                    | ICL3a             | 11                  | 2                      | 1            |
|                   |              |                       | ICL3d             | 13                  | 4                      | 3            |
|                   |              |                       | ICL3e             | 11                  | 3                      | 2            |
|                   |              |                       | ICL3f             | 11                  | 2                      | 2            |
| ICL5              | 182 AA       | 20                    | ICL5a             | 16                  | 1                      | 5            |
|                   |              |                       | ICL5b             | 16                  | 1                      | 4            |
|                   |              |                       | ICL6a             | 16                  | 1                      | 7            |
|                   |              |                       | ICL6b             | 14                  | 0                      | 4            |
| GSPATP00007371001 | 869 AA       | 15                    | GSPATP00007371001 | 10                  | 7                      | 1            |
|                   |              |                       | GSPATP00015324001 | 7                   | 5                      | 0            |
| GSPATP00017054001 | 456 AA       | 13                    | GSPATP00017054001 | 9                   | 5                      | 3            |
|                   |              |                       | GSPATP00035271001 | 8                   | 4                      | 2            |
| ICL7              | 185 AA       | 12                    | ICL7a             | 11                  | 4                      | 8            |
|                   |              |                       | ICL7b             | 8                   | 1                      | 6            |
| Beta_tubulin      | 442 AA       | 12                    | tub_betaPT1       | 12                  | 0                      | 206          |
|                   |              |                       | tub_betaPT2       | 12                  | 0                      | 145          |
| ICL1e             | 175 AA       | 10                    | ICL1e             | 8                   | 0**                    | 6            |
|                   |              |                       | ICL1g             | 8                   | 0**                    | 8            |
|                   |              |                       | PtCen8            | 4                   | 1                      | 0            |
|                   |              |                       | PtCen15           | 5                   | 0                      | 0            |
|                   |              |                       | PtCen10           | 5                   | 0                      | 0            |
|                   |              |                       | PtCen12           | 5                   | 0                      | 4            |
| Striatin 4        | 257 AA       | 9                     | KdD6              | 4                   | 0                      | 3            |
|                   |              |                       | GSPATP00038161001 | 3                   | 0                      | 3            |
|                   |              |                       | KdD5              | 3                   | 0                      | 10           |
|                   |              |                       | KdD4              | 4                   | 1                      | 3            |
|                   |              |                       | KdD3              | 4                   | 0                      | 3            |
|                   |              |                       | KdD2              | 6                   | 0                      | 4            |
| ICL8              | 185 AA       | 8                     | KdD1              | 5                   | 0                      | 6            |
|                   |              |                       | ICL8a             | 6                   | 2                      | 1            |
|                   |              |                       | ICL8b             | 6                   | 2                      | 8            |
|                   |              |                       | PtCenBP3          | 6                   | 4                      | 0            |
|                   |              |                       | PtCenBP2          | 3                   | 1                      | 0            |
|                   |              |                       | Alpha_tubulin     | 449 AA              | 6                      | tub_alphaPT3 |
| tub_alphaPT4      | 6            | 0                     |                   |                     |                        | 76           |
| tub_alphaPT2      | 6            | 0                     |                   |                     |                        | 72           |
| tub_alphaPT1      | 4            | 0                     |                   |                     |                        | 296          |
| tub_alphaPT1      | 2            | 0                     |                   |                     |                        | 264          |
| tub_alphaPT8      | 5            | 0                     |                   |                     |                        | 17           |
| Striatin 1        | 248 AA       | 6                     | KdG2              | 3                   | 0                      | 7            |
|                   |              |                       | KdG1              | 3                   | 0                      | 1            |
|                   |              |                       | GSPATP00004838001 | 3                   | 0                      | 6            |
|                   |              |                       | GSPATP00003161001 | 3                   | 0                      | 4            |
|                   |              |                       | KdG4              | 2                   | 0                      | 4            |
|                   |              |                       | KdG3              | 2                   | 0                      | 3            |
|                   |              |                       | KdG5              | 4                   | 0                      | 6            |

|                   |         |   |                   |   |   |     |
|-------------------|---------|---|-------------------|---|---|-----|
|                   |         |   | GSPATP00030915001 | 4 | 0 | 2   |
|                   |         |   | GSPATP00021965001 | 4 | 0 | 4   |
|                   |         |   | KdG6              | 4 | 0 | 5   |
| ICL3b             |         | 5 | ICL3b             | 5 | 2 | 1   |
|                   |         |   | ICL3g             | 5 | 0 | 1   |
| GSPATP00020504001 | 279 AA  | 5 | GSPATP00020504001 | 3 | 0 | 9   |
|                   |         |   | GSPATP00027352001 | 3 | 0 | 4   |
|                   |         |   | GSPATP00015160001 | 3 | 0 | 5   |
|                   |         |   | GSPATP00007561001 | 2 | 0 | 4   |
|                   |         |   | GSPATP00038112001 | 2 | 0 | 1   |
|                   |         |   | GSPATP00014874001 | 3 | 0 | 0   |
|                   |         |   | GSPATP00008270001 | 3 | 0 | 0   |
|                   |         |   | GSPATP00013148001 | 3 | 0 | 0   |
|                   |         |   | GSPATP00038461001 | 1 | 0 | 0   |
|                   |         |   | GSPATP00013823001 | 1 | 0 | 3   |
| ICL11             | 240 AA  | 4 | ICL11a            | 4 | 2 | 0   |
|                   |         |   | ICL11b            | 2 | 0 | 0   |
|                   |         |   | ICL11c            | 3 | 1 | 2   |
| Striatin 6        | 251 AA  | 4 | GSPATP00036963001 | 4 | 0 | 5   |
|                   |         |   | KdF2              | 4 | 0 | 9   |
|                   |         |   | KdF1              | 4 | 0 | 6   |
|                   |         |   | GSPATP00034214001 | 4 | 0 | 8   |
| Striatin 5        | 249 AA  | 4 | GSPATP00008626001 | 1 | 0 | 0   |
|                   |         |   | KdE1              | 4 | 0 | 5   |
|                   |         |   | KdE2              | 4 | 0 | 8   |
|                   |         |   | KdE3              | 3 | 0 | 2   |
|                   |         |   | KdE4              | 3 | 0 | 2   |
|                   |         |   | KdE6              | 1 | 0 | 1   |
| Striatin 2        | 313 AA  | 3 | KdB2              |   |   | 254 |
| GSPATP00008532001 | 537 AA  | 3 | GSPATP00008532001 | 3 | 2 | 26  |
|                   |         |   | GSPATP00012897001 | 1 | 0 | 0   |
| ICL10             | 206 AA  | 2 | ICL10a            | 2 | 1 | 0   |
|                   |         |   | ICL10b            | 1 | 0 | 0   |
| GSPATP00034697001 | 363 AA  | 2 | GSPATP00034697001 | 2 | 1 | 41  |
|                   |         |   | GSPATP00037510001 | 1 | 0 | 59  |
| GSPATP00009071001 | 2189 AA | 2 | GSPATP00009071001 |   |   | 1   |
| GSPATP00025189001 | 2175 AA | 2 | GSPATP00025189001 |   |   | 0   |

The table summarizes the different protein subfamilies identified by mass spectrometry. This table indicates the protein size, the total number of peptides matching each sub-family, the number of peptides matching each gene and the number of peptides that match only one gene. \* indicates that even if ICL1ap and ICL1dp do not have specific peptides, at least one of them is present in the ICL, since 6 peptides are only shared by these proteins. \*\*Similarly, 4 peptides are only found in ICL1ep and ICL1gp indicating that at least one of them is an ICL constituent. The number of sequenced ESTs, available at ParameciumDB (Arnaiz, 2007) gives an idea of the level of expression of each protein. For example tubulins and striatin2 present a very high level of expression (more than 200 ESTs) compared with the other proteins of the infraciliary lattice and are likely to be contaminant proteins.
