# Supplementary material for: Functional diversification of centrins and cell morphological complexity
Source: Oxford University Press journal article supplement (doi:10.1242/jcs.019414), 2007-12-06
Supplement: jcs019414-sup-019414-tables2.pdf [file jcs019414-sup-019414-tables2.pdf]

**Table S2. List of the oligonucleotides used for gene cloning**

| Primer name     | Sequence (5'-3')                                      |
|-----------------|-------------------------------------------------------|
| ICL1a_ATG+KpnI  | ttaaggtaccggaggaggaATGGCACGAAGAGGATAG                 |
| ICL1a_TGA+KpnI  | ttaaggtaccTCATGCAAAGGTCTTTTTTGTGTC                    |
| ICL3b_ATG+KpnI  | ttaaggtaccggaggaggaATGAGACCAAATCCTCGTTAACAATCAAAAAAAG |
| ICL3b_TGA+KpnI  | ttaaggtaccTCAATCATAATAGACTCTTCCAGTCATC                |
| ICL3d_ATG+KpnI  | ttaaggtaccggaggaggaATGTCCAGATAAGCTCCATC               |
| ICL3d_TGA+KpnI  | ttaaggtaccTCATTATTTTCCGTATTCC                         |
| ICL5a_ATG+KpnI  | ttaaggtaccggaggaggaATGTCTAGAACAAACAAATAGG             |
| ICL5a_TGA+KpnI  | ttaaggtaccTCAATATCTTCTTGGAGCGG                        |
| ICL7a_ATG+SpeI  | ttaaactagtATGAATCAATAAATTTTAGATAAAGACGAG              |
| ICL7a_end+XhoII | ttaactcgagaTTTTGTTCTGAGAACTTCAGTCTCAATT               |
| ICL8a_ATG+KpnI  | ttaaggtaccggaggaggaATGAGCAGAAGAGAATAGATAGAGAAG        |
| ICL8a_TGA+KpnI  | ttaaggtaccTCATTTGTTTCTATAGATTTCTTATTCAACTT            |
| ICL9a_ATG+KpnI  | ttaaggtaccTCATGCTTGATTTGGGTATTCTTTTTGAAC              |
| ICL9a_TGA+KpnI  | ttaaggtaccggaggaggaATGAATAGAAATCAATCCAGATAATAGTCAG    |
| ICL10a_ATG+SpeI | ttaaactagtATGAATAGAAAGAAAAATACAACATCAG                |
| ICL10a_end+XhoI | ttaactcgagaTCCATTTTTCTTTTGTAGACTTTTCATATA             |
| ICL11a_1        | GAATCTGATATTATAGATATCAAG                              |
| ICL11a_TGA+KpnI | ttaaggtaccTCAATAATACACCTTTTTTGGTCA                    |
| CenBP3_ATG+KpnI | ttaaggtaccggaggaggaATGCTCTCTGATTCCAAGTATGATATTTTTAC   |
| CenBP3_TGA+KpnI | ttaaggtaccTCATTTAAGTTAGTATTCAGAAATGGCAAC              |
| CenBP3_feeding1 | ttaactcgagTTTCGATTTCGATTTCGATCCTATAGAAGAATG           |
| CenBP3_feeding2 | ttaaggtaccTCATTTAAGTTAGTATTCAGAAATGGCAAC              |
| ICL1e-5'        | GTTAATAAGTTTATTTTCATTTATATATAAACCT                    |
| ICL1e-ATG       | AGTTTGAGATCTGAAAAATAATTAATATATAAA                     |
| ICL1e-ATG2      | TTAATTATTTTTTCAGATCTCAAACTTTAATGAGCA                  |
| ICL1e-3'        | ATTAATCTATGAACATTTATATTGTATAATCAA                     |
| ICL10a-5'       | CAGGTAATTCTTAGTTATATCATAATTAATATC                     |
| ICL10a-ATG      | ATTTATAATAGATCTATTATGTATTGATAATTG                     |
| ICL10a-ATG2     | AATACATAATAGATCTATTATAAATATGAATAG                     |
| ICL10a-3'       | AGAAGAGAAAATTGAAGATGTGGAACATAACTT                     |
